# Supplementary material for: Mitochondrial Capture Misleads about Ecological Speciation in the Daphnia pulex Complex
Source: PubMed Central journal article supplement (PMC3711805; doi:10.1371/journal.pone.0069497), 2013-07-15
Supplement: pone.0069497.s003.pdf [file pone.0069497.s003.pdf]

**Table S1.** Individuals of the *Daphnia pulex* species complex included in this study

| Code   | Rab4 GenBank Accession | LDHA GenBank Accession | ND5 GenBank Accession | Species                            | mtDNA lineage | Latitude | Longitude | Locality       | Country        | Reference          | Lab Key   |
|--------|------------------------|------------------------|-----------------------|------------------------------------|---------------|----------|-----------|----------------|----------------|--------------------|-----------|
| ALB-01 | KC536321, KC536322     |                        | KC536551              | <i>D. pulicaria</i>                | EPC           | 40.95    | 20.71     | Ohrid          | Albania        | this paper         | DP074_004 |
| ALB-02 | KC536323, KC536324     |                        | KC536552              | <i>D. pulicaria</i>                | EPC           | 40.95    | 20.71     | Ohrid          | Albania        | this paper         | DP074_005 |
| ALB-03 | KC536325, KC536326     |                        | KC536552              | <i>D. pulicaria</i>                | EPC           | 40.95    | 20.71     | Ohrid          | Albania        | this paper         | DP075_004 |
| ALB-04 | KC536327, KC536328     |                        | KC536553              | <i>D. pulicaria</i>                | EPC           | 40.95    | 20.71     | Ohrid          | Albania        | this paper         | DP075_005 |
| AUT-01 | KC536237, KC536238     | KC535985, KC535986     | KC536529              | <i>D. pulicaria</i>                | EPC           | 47.10    | 11.74     | Alps           | Austria        | this paper         | DP036_001 |
| AUT-02 | KC536239, KC536240     |                        | KC536530              | <i>D. pulicaria</i>                | EPC           | 47.10    | 11.74     | Alps           | Austria        | this paper         | DP036_005 |
| AUT-03 | KC536241, KC536242     |                        | KC536529              | <i>D. pulicaria</i>                | EPC           | 47.10    | 11.74     | Alps           | Austria        | this paper         | DP036_006 |
| AUT-04 | KC536243, KC536244     |                        | KC536529              | <i>D. pulicaria</i>                | EPC           | 47.10    | 11.74     | Alps           | Austria        | this paper         | DP036_007 |
| AUT-05 | KC536245, KC536246     |                        | KC536530              | <i>D. pulicaria</i>                | EPC           | 47.10    | 11.74     | Alps           | Austria        | this paper         | DP036_008 |
| AUT-06 |                        |                        | KC536529              | <i>D. pulicaria</i>                | EPC           | 47.10    | 11.74     | Alps           | Austria        | this paper         | DP036_009 |
| AUT-07 | KC536247, KC536248     |                        | KC536531              | <i>D. pulicaria</i>                | EPC           | 47.04    | 10.89     | Alps           | Austria        | this paper         | DP037_001 |
| AUT-08 | KC536249, KC536250     |                        | KC536532              | <i>D. pulicaria</i>                | EPC           | 47.04    | 10.89     | Alps           | Austria        | this paper         | DP037_005 |
| AUT-09 | KC536251, KC536252     |                        | KC536532              | <i>D. pulicaria</i>                | EPC           | 47.04    | 10.89     | Alps           | Austria        | this paper         | DP037_006 |
| AUT-10 | KC536253, KC536254     |                        | KC536533              | <i>D. pulicaria</i>                | EPC           | 47.04    | 10.89     | Alps           | Austria        | this paper         | DP037_007 |
| AUT-11 | KC536255, KC536256     |                        | KC536531              | <i>D. pulicaria</i>                | EPC           | 47.04    | 10.89     | Alps           | Austria        | this paper         | DP037_008 |
| AUT-12 |                        |                        | KC536531              | <i>D. pulicaria</i>                | EPC           | 47.04    | 10.89     | Alps           | Austria        | this paper         | DP037_009 |
| AUT-13 | KC536257, KC536258     |                        | KC536534              | <i>D. pulicaria</i>                | EPC           | 46.97    | 12.28     | Alps           | Austria        | this paper         | DP038_001 |
| AUT-14 | KC536259, KC536260     |                        | KC536530              | <i>D. pulicaria</i>                | EPC           | 46.97    | 12.28     | Alps           | Austria        | this paper         | DP038_005 |
| AUT-15 | KC536261, KC536262     |                        | KC536534              | <i>D. pulicaria</i>                | EPC           | 46.97    | 12.28     | Alps           | Austria        | this paper         | DP038_006 |
| AUT-16 | KC536263, KC536264     |                        | KC536530              | <i>D. pulicaria</i>                | EPC           | 46.97    | 12.28     | Alps           | Austria        | this paper         | DP038_007 |
| AUT-17 | KC536265, KC536266     |                        | KC536534              | <i>D. pulicaria</i>                | EPC           | 46.97    | 12.28     | Alps           | Austria        | this paper         | DP038_008 |
| AUT-18 |                        | KC535987, KC535988     |                       | <i>D. pulicaria</i>                | missing       | 47.04    | 10.89     | Alps           | Austria        | this paper         | DP037_002 |
| BOL-01 |                        | JN117749, JN117740     |                       | South American <i>D. pulicaria</i> | SAPC          | -17.04   | -66.61    | Ayopaya        | Bolivia        | Crease et al. 2011 | SAPC01    |
| BOL-02 |                        | JN117749, JN117740     |                       | South American <i>D. pulicaria</i> | SAPC          | -15.80   | -69.38    | Titicaca Lake  | Bolivia        | Crease et al. 2011 | SAPC03    |
| CHE-01 | KC536277, KC536278     |                        | KC536536              | <i>D. pulicaria</i>                | EPC           | 46.67    | 8.04      | Alps           | Switzerland    | this paper         | DP041_001 |
| CHE-02 | KC536279, KC536280     |                        | KC536536              | <i>D. pulicaria</i>                | EPC           | 46.67    | 8.04      | Alps           | Switzerland    | this paper         | DP041_005 |
| CHE-03 | KC536281, KC536282     |                        | KC536537              | <i>D. pulicaria</i>                | EPC           | 46.67    | 8.04      | Alps           | Switzerland    | this paper         | DP041_006 |
| CHE-04 | KC536283, KC536284     |                        | KC536537              | <i>D. pulicaria</i>                | EPC           | 46.67    | 8.04      | Alps           | Switzerland    | this paper         | DP041_007 |
| CHE-05 | KC536285, KC536286     |                        | KC536538              | <i>D. pulicaria</i>                | EPC           | 46.67    | 8.04      | Alps           | Switzerland    | this paper         | DP041_008 |
| CHE-06 |                        |                        | KC536536              | <i>D. pulicaria</i>                | EPC           | 46.67    | 8.04      | Alps           | Switzerland    | this paper         | DP041_009 |
| CHE-07 | KC536387, KC536388     | KC536019, KC536020     | KC536578              | <i>D. pulicaria</i>                | EPC           | 46.38    | 7.46      | Alps           | Switzerland    | this paper         | DP126_001 |
| CHE-08 |                        |                        | KC536578              | <i>D. pulicaria</i>                | EPC           | 46.38    | 7.46      | Alps           | Switzerland    | this paper         | DP126_002 |
| CHE-09 |                        |                        | KC536578              | <i>D. pulicaria</i>                | EPC           | 46.38    | 7.46      | Alps           | Switzerland    | this paper         | DP126_003 |
| CHE-09 | KC536429, KC536430     | KC536058, KC536059     | KC536546              | <i>D. pulicaria</i>                | EPC           | 47.70    | 9.02      | Lake Constance | Switzerland    | this paper         | DP155_001 |
| CHE-10 |                        |                        | KC536546              | <i>D. pulicaria</i>                | EPC           | 47.70    | 9.02      | Lake Constance | Switzerland    | this paper         | DP155_002 |
| CHE-11 |                        |                        | KC536546              | <i>D. pulicaria</i>                | EPC           | 47.70    | 9.02      | Lake Constance | Switzerland    | this paper         | DP155_003 |
| CHE-12 |                        |                        | KC536591              | <i>D. pulicaria</i>                | EPC           | 47.70    | 9.02      | Lake Constance | Switzerland    | this paper         | DP155_004 |
| CZE-01 | KC536297, KC536298     |                        | KC536543              | <i>D. pulicaria</i>                | EPC           | 49.78    | 15.23     | Bohdaneč       | Czech Republic | this paper         | DP048_001 |
| CZE-02 | KC536299, KC536300     |                        | KC536543              | <i>D. pulicaria</i>                | EPC           | 49.78    | 15.23     | Bohdaneč       | Czech Republic | this paper         | DP048_003 |
| CZE-03 | KC536301, KC536302     |                        | KC536544              | <i>D. pulex</i>                    | EPX           | 49.42    | 13.78     | Blatná         | Czech Republic | this paper         | DP056_001 |
| CZE-04 |                        |                        | KC536545              | <i>D. pulex</i>                    | EPX           | 49.42    | 13.78     | Blatná         | Czech Republic | this paper         | DP056_002 |
| CZE-05 |                        |                        | KC536544              | <i>D. pulex</i>                    | EPX           | 49.42    | 13.78     | Blatná         | Czech Republic | this paper         | DP056_003 |
| CZE-06 |                        |                        | KC536544              | <i>D. pulex</i>                    | EPX           | 49.42    | 13.78     | Blatná         | Czech Republic | this paper         | DP056_004 |
| CZE-07 | KC536303, KC536304     | KC535996, KC535997     | KC536545              | <i>D. pulex</i>                    | EPX           | 49.42    | 13.78     | Blatná         | Czech Republic | this paper         | DP056_010 |
| CZE-08 | KC536305, KC536306     |                        |                       | <i>D. pulex</i>                    | missing       | 49.42    | 13.78     | Blatná         | Czech Republic | this paper         | DP056_021 |
| CZE-09 | KC536307, KC536308     |                        | KC536546              | <i>D. pulicaria</i>                | EPC           | 50.66    | 13.94     | Chabařovice    | Czech Republic | this paper         | DP057_003 |
| CZE-10 |                        | KC536000, KC536001     | KC536546              | <i>D. pulicaria</i>                | EPC           | 50.66    | 13.94     | Chabařovice    | Czech Republic | this paper         | DP071_01M |
| CZE-11 |                        |                        | KC536546              | <i>D. pulicaria</i>                | EPC           | 50.66    | 13.94     | Chabařovice    | Czech Republic | this paper         | DP071_004 |
| CZE-12 | KC536317, KC536318     |                        |                       | <i>D. pulicaria</i>                | missing       | 50.66    | 13.94     | Chabařovice    | Czech Republic | this paper         | DP071_05M |
| CZE-13 | KC536319, KC536320     |                        |                       | <i>D. pulicaria</i>                | missing       | 50.66    | 13.94     | Chabařovice    | Czech Republic | this paper         | DP071_008 |
| CZE-14 | KC536309, KC536310     | KC535998, KC535999     | KC536547              | <i>D. pulicaria</i>                | EPC           | 49.44    | 13.78     | Blatná         | Czech Republic | this paper         | DP058_004 |

|        |                              |                              |          |                     |         |       |        |                         |                |                       |            |
|--------|------------------------------|------------------------------|----------|---------------------|---------|-------|--------|-------------------------|----------------|-----------------------|------------|
| CZE-15 |                              |                              | KC536548 | <i>D. pulicaria</i> | EPC     | 49.44 | 13.78  | Blatná                  | Czech Republic | this paper            | DP058_005  |
| CZE-16 | KC536311, KC536312           |                              | KC536549 | <i>D. pulicaria</i> | EPC     | 49.44 | 13.78  | Blatná                  | Czech Republic | this paper            | DP058_006  |
| CZE-17 | KC536313, KC536314           |                              |          | <i>D. pulicaria</i> | missing | 49.44 | 13.78  | Blatná                  | Czech Republic | this paper            | DP058_007  |
| CZE-18 | KC536315, KC536316           |                              | KC536550 | <i>D. pulicaria</i> | EPC     | 50.20 | 13.91  | Mšec                    | Czech Republic | this paper            | DP064_002  |
| CZE-19 | HQ434704                     |                              | FJ591100 | <i>D. pulicaria</i> | EPC     | 49.41 | 13.77  | Blatna                  | Czech Republic | Vergilino et al. 2011 | Chmelnice  |
| CZE-20 | HQ434748                     |                              | HQ434662 | <i>D. pulicaria</i> | EPC     | 49.40 | 13.81  | Blatná                  | Czech Republic | Vergilino et al. 2011 | Mala_kus_5 |
| CZE-21 |                              | JN117728, JN117729           |          | <i>D. pulicaria</i> | EPC     | 50.08 | 14.48  |                         | Czech Republic | Crease et al. 2011    | EPC01      |
| CZE-22 |                              | JN117730                     |          | <i>D. pulicaria</i> | EPC     | 50.18 | 12.88  |                         | Czech Republic | Crease et al. 2011    | EPC03_CZR  |
| CZE-23 |                              | JN117731, JN117732           |          | <i>D. pulex</i>     | EPX     | 48.88 | 14.63  |                         | Czech Republic | Crease et al. 2011    | EPX_CZR    |
| DEU-01 | KC536431, KC536432           | KC536065, KC536066           | KC536593 | <i>D. pulex</i>     | EPX     | 49.00 | 12.15  | Regensburg              | Germany        | this paper            | DP165_001  |
| DEU-02 | KC536433, KC536434           | KC536067, KC536068           | KC536593 | <i>D. pulex</i>     | EPX     | 49.00 | 12.15  | Regensburg              | Germany        | this paper            | DP165_002  |
| DEU-03 |                              |                              | KC536546 | <i>D. pulicaria</i> | EPC     | 54.32 | 10.63  | Grosser Binnensee       | Germany        | this paper            | L16        |
| ESP-01 | KC536171, KC536172           |                              | KC536512 | <i>D. pulicaria</i> | EPC     | 37.05 | -3.33  | Sierra Nevada           | Spain          | this paper            | DP019_001  |
| ESP-02 | KC536173, KC536174           |                              | KC536513 | <i>D. pulicaria</i> | EPC     | 37.05 | -3.33  | Sierra Nevada           | Spain          | this paper            | DP019_005  |
| ESP-03 | KC536175, KC536176           |                              | KC536514 | <i>D. pulicaria</i> | EPC     | 37.05 | -3.33  | Sierra Nevada           | Spain          | this paper            | DP019_006  |
| ESP-04 | KC536177, KC536178           |                              | KC536513 | <i>D. pulicaria</i> | EPC     | 37.05 | -3.33  | Sierra Nevada           | Spain          | this paper            | DP019_007  |
| ESP-05 | KC536179, KC536180           |                              | KC536514 | <i>D. pulicaria</i> | EPC     | 37.05 | -3.33  | Sierra Nevada           | Spain          | this paper            | DP019_008  |
| ESP-06 |                              |                              | KC536513 | <i>D. pulicaria</i> | EPC     | 37.05 | -3.33  | Sierra Nevada           | Spain          | this paper            | DP019_009  |
| ESP-07 | KC536181, KC536182           |                              | KC536515 | <i>D. pulicaria</i> | EPC     | 37.05 | -3.34  | Sierra Nevada           | Spain          | this paper            | DP020_002  |
| ESP-08 | KC536183, KC536184           |                              | KC536516 | <i>D. pulicaria</i> | EPC     | 37.05 | -3.34  | Sierra Nevada           | Spain          | this paper            | DP020_005  |
| ESP-09 | KC536185, KC536186           |                              | KC536516 | <i>D. pulicaria</i> | EPC     | 37.05 | -3.34  | Sierra Nevada           | Spain          | this paper            | DP020_006  |
| ESP-10 | KC536187, KC536188           |                              | KC536516 | <i>D. pulicaria</i> | EPC     | 37.05 | -3.34  | Sierra Nevada           | Spain          | this paper            | DP020_007  |
| ESP-11 | KC536189, KC536190           |                              | KC536516 | <i>D. pulicaria</i> | EPC     | 37.05 | -3.34  | Sierra Nevada           | Spain          | this paper            | DP020_008  |
| ESP-12 |                              |                              | KC536517 | <i>D. pulicaria</i> | EPC     | 37.05 | -3.34  | Sierra Nevada           | Spain          | this paper            | DP020_009  |
| ESP-13 | KC536191, KC536192           |                              |          | <i>D. pulicaria</i> | missing | 42.66 | 1.39   | Pyrenees                | Spain          | this paper            | DP021_003  |
| ESP-14 | KC536193, KC536194           |                              | KC536518 | <i>D. pulicaria</i> | EPC     | 42.66 | 1.39   | Pyrenees                | Spain          | this paper            | DP021_005  |
| ESP-15 | KC536195, KC536196           |                              | KC536519 | <i>D. pulicaria</i> | EPC     | 42.66 | 1.39   | Pyrenees                | Spain          | this paper            | DP021_006  |
| ESP-16 | KC536197, KC536198           |                              | KC536519 | <i>D. pulicaria</i> | EPC     | 42.66 | 1.39   | Pyrenees                | Spain          | this paper            | DP021_18M  |
| ESP-17 | KC536199, KC536200           |                              | KC536574 | <i>D. pulicaria</i> | EPC     | 42.66 | 1.39   | Pyrenees                | Spain          | this paper            | DP105_001  |
| ESP-18 | KC536201, KC536202           |                              | KC536519 | <i>D. pulicaria</i> | EPC     | 42.65 | 1.38   | Pyrenees                | Spain          | this paper            | DP022_001  |
| ESP-19 |                              |                              | KC536520 | <i>D. pulicaria</i> | EPC     | 42.65 | 1.38   | Pyrenees                | Spain          | this paper            | DP022_008  |
| ESP-20 | KC536203, KC536204           | KC535971, KC535972           | KC536519 | <i>D. pulicaria</i> | EPC     | 42.65 | 1.38   | Pyrenees                | Spain          | this paper            | DP022_010  |
| ESP-21 |                              | KC535973, KC535974           | KC536521 | <i>D. pulicaria</i> | EPC     | 42.65 | 1.38   | Pyrenees                | Spain          | this paper            | DP022_011  |
| ESP-22 | KC536205, KC536206           |                              | KC536522 | <i>D. pulicaria</i> | EPC     | 42.65 | 1.38   | Pyrenees                | Spain          | this paper            | DP022_17M  |
| ESP-23 | KC536207, KC536208           |                              | KC536523 | <i>D. pulicaria</i> | EPC     | 42.64 | 0.78   | Pyrenees                | Spain          | this paper            | DP023_007  |
| ESP-24 | KC536209, KC536210           |                              | KC536524 | <i>D. pulicaria</i> | EPC     | 42.64 | 0.78   | Pyrenees                | Spain          | this paper            | DP023_008  |
| ESP-25 | KC536211, KC536212           |                              | KC536523 | <i>D. pulicaria</i> | EPC     | 42.64 | 0.78   | Pyrenees                | Spain          | this paper            | DP023_009  |
| ESP-26 |                              | KC535975, KC535976           | KC536523 | <i>D. pulicaria</i> | EPC     | 42.64 | 0.78   | Pyrenees                | Spain          | this paper            | DP023_010  |
| ESP-27 | KC536213, KC536214           | KC535977, KC535978           | KC536523 | <i>D. pulicaria</i> | EPC     | 42.64 | 0.78   | Pyrenees                | Spain          | this paper            | DP023_11M  |
| ESP-28 | KC536215, KC536216           | KC535979, KC535980           | KC536523 | <i>D. pulicaria</i> | EPC     | 42.64 | 0.78   | Pyrenees                | Spain          | this paper            | DP023_17M  |
| ESP-29 |                              |                              | KC536575 | <i>D. pulicaria</i> | EPC     | 42.64 | 0.78   | Pyrenees                | Spain          | this paper            | DP106_001  |
| ESP-30 |                              |                              | KC536523 | <i>D. pulicaria</i> | EPC     | 42.64 | 0.78   | Pyrenees                | Spain          | this paper            | DP106_002  |
| ESP-31 |                              |                              | KC536542 | <i>D. pulicaria</i> | EPC     | 41.00 | -3.50  | San Rafael de Matallana | Spain          | this paper            | DP047_001  |
| ESP-32 | HQ434761                     |                              | HQ434652 | <i>D. pulicaria</i> | EPC     | 42.63 | 1.00   | Pyrenees                | Spain          | Vergilino et al. 2011 | Ger1a      |
| ESP-33 |                              | JN117728                     |          | <i>D. pulicaria</i> | EPC     | 42.63 | 1.00   | Pyrenees                | Spain          | Crease et al. 2011    | EPC02_SPA  |
| GBR-01 | KC536293, KC536294           | KC535994, KC535995           | KC536541 | <i>D. pulicaria</i> | EPC     | 51.39 | -0.40  | London                  | United Kingdom | this paper            | DP044_001  |
| GBR-02 | KC536295, KC536296           |                              | KC536541 | <i>D. pulicaria</i> | EPC     | 51.65 | -0.02  | London                  | United Kingdom | this paper            | DP045_003  |
| GBR-03 | KC536385, KC536386           | KC536017, KC536018           | KC536576 | <i>D. pulicaria</i> | EPC     | 56.75 | -4.90  | Ben Nevis               | United Kingdom | this paper            | DP118_001  |
| GBR-04 |                              |                              | KC536577 | <i>D. pulicaria</i> | EPC     | 56.75 | -4.90  | Ben Nevis               | United Kingdom | this paper            | DP118_002  |
| GBR-05 |                              |                              | KC536576 | <i>D. pulicaria</i> | EPC     | 56.75 | -4.90  | Ben Nevis               | United Kingdom | this paper            | DP118_003  |
| GBR-06 | KC536435, KC536436           | KC536071, KC536072           | KC536555 | <i>D. pulex</i>     | EPX     | 52.14 | 0.35   | West Wrattling          | United Kingdom | this paper            | DP167_001  |
| GBR-07 | KC536437, KC536438           | KC536073, KC536074           | KC536555 | <i>D. pulex</i>     | EPX     | 52.14 | 0.35   | West Wrattling          | United Kingdom | this paper            | DP168_001  |
| GBR-08 | KC536439, KC536440           | KC536075, KC536076           | KC536555 | <i>D. pulex</i>     | EPX     | 52.10 | 0.37   | Streety End             | United Kingdom | this paper            | DP169_001  |
| GRL-01 | KC536410, KC536411, KC536412 | KC536041, KC536042, KC536043 | KC536586 | <i>D. pulicaria</i> | NAPC    | 64.15 | -51.31 | Nuuk                    | Greenland      | this paper            | DP132_001  |
| GRL-02 |                              |                              | KC536586 | <i>D. pulicaria</i> | NAPC    | 64.15 | -51.31 | Nuuk                    | Greenland      | this paper            | DP132_002  |

|        |                              |                              |          |                                              |      |       |         |                              |           |                       |           |
|--------|------------------------------|------------------------------|----------|----------------------------------------------|------|-------|---------|------------------------------|-----------|-----------------------|-----------|
| GRL-03 | KC536413, KC536414, KC536415 | KC536044, KC536045           | KC536586 | <i>D. pulicaria</i>                          | NAPC | 64.15 | -51.31  | Nuuk                         | Greenland | this paper            | DP132_003 |
| GRL-04 | KC536416, KC536417, KC536418 | KC536046, KC536047           | KC536586 | <i>D. pulicaria</i>                          | NAPC | 64.15 | -51.31  | Nuuk                         | Greenland | this paper            | DP132_004 |
| GRL-05 | KC536494, KC536495           | KC536126, KC536127           | KC536620 | Hybrid <i>D. pulicaria</i> X <i>D. pulex</i> | NAPC | 69.21 | -51.10  | Jakobshavn                   | Greenland | this paper            | L1        |
| HUN-01 |                              |                              | KC536541 | <i>D. pulicaria</i>                          | EPC  | 47.57 | 21.16   | Hortobagy                    | Hungaria  | this paper            | DP046_003 |
| ID-01  | EU918527, EU918528           |                              |          | <i>D. pulicaria</i>                          | NAPC | 42.35 | -112.44 | Idaho                        | USA       | Omilian et al. 2008   | DAN15_ID  |
| ID-02  |                              | JN117740, JN117735           |          | <i>D. pulicaria</i>                          | NAPX | 42.35 | -112.44 | Idaho                        | USA       | Crease et al. 2011    | C08_ID    |
| IL-01  | KC536454, KC536455           |                              | KC536599 | <i>D. pulex</i>                              | NAPX | 40.13 | -88.22  | Bussey woods, Illinois       | USA       | this paper            | DX011_001 |
| IL-02  | HQ434752                     |                              | HQ434667 | <i>D. pulicaria</i>                          | NAPX | 40.12 | -87.70  | Vermillion Country, Illinois | USA       | Vergilino et al. 2011 | Pul9      |
| IL-03  | HQ434753                     |                              | HQ434669 | <i>D. pulicaria</i>                          | NAPX | 40.12 | -87.70  | Vermillion Country, Illinois | USA       | Vergilino et al. 2011 | Pul15     |
| IL-04  | EU918457, EU918458           |                              |          | <i>D.pulex</i>                               | NAPX | 40.20 | -89.00  | Illinois                     | USA       | Omilian et al. 2008   | West2_IL  |
| IL-05  | EU918459, EU918460           |                              |          | <i>D.pulex</i>                               | NAPX | 40.20 | -89.00  | Illinois                     | USA       | Omilian et al. 2008   | West5_IL  |
| IL-06  |                              | JN117733                     |          | <i>D. pulicaria</i>                          | NAPX | 40.14 | -87.74  | Illinois                     | USA       | Crease et al. 2011    | C07_IL    |
| IL-07  |                              | JN117733                     |          | <i>D. pulicaria</i>                          | NAPX | 40.13 | -87.73  | Illinois                     | USA       | Crease et al. 2011    | C09_IL    |
| IL-08  |                              | JN117733                     |          | <i>D. pulicaria</i>                          | NAPX | 40.15 | -87.74  | Illinois                     | USA       | Crease et al. 2011    | C10_IL    |
| IL-09  |                              | JN117762, JN117770           |          | <i>D.pulex</i>                               | NAPX | 40.12 | -88.20  | Illinois                     | USA       | Crease et al. 2011    | X02_IL    |
| IL-10  |                              | JN117772, JN117773           |          | <i>D.pulex</i>                               | NAPX | 40.06 | -87.92  | Illinois                     | USA       | Crease et al. 2011    | X04_IL    |
| IL-11  |                              | JN117776, JN117777           |          | <i>D.pulex</i>                               | NAPX | 40.14 | -87.74  | Illinois                     | USA       | Crease et al. 2011    | X08_IL    |
| IL-12  |                              | JN117762, JN117800           |          | <i>D.pulex</i>                               | NAPX | 41.69 | -89.27  | Illinois                     | USA       | Crease et al. 2011    | X35_IL    |
| IN-01  | KC536456, KC536457           | KC536085, KC536086           | KC536600 | <i>D. pulicaria</i>                          | NAPC | 39.90 | -85.43  | Indiana                      | USA       | this paper            | DX012_001 |
| IN-02  | KC536458, KC536459           | KC536087, KC536088           | KC536601 | <i>D. pulicaria</i>                          | NAPC | 39.90 | -85.43  | Indiana                      | USA       | this paper            | DX013_001 |
| IN-03  | HQ434758                     |                              | FJ591104 | <i>D.pulicaria</i>                           | NAPC | 40.00 | -86.00  | Indiana                      | USA       | Vergilino et al. 2011 | W4_95     |
| IN-04  | EU918461, EU918462           |                              |          | <i>D. pulex</i>                              | NAPX | 40.00 | -86.00  | Indiana                      | USA       | Omilian et al. 2008   | SAL5_IN   |
| IN-05  | EU918463, EU918464           |                              |          | <i>D. pulex</i>                              | NAPX | 40.00 | -86.00  | Indiana                      | USA       | Omilian et al. 2008   | SAL7_IN   |
| IN-06  | EU918465, EU918466           |                              |          | <i>D. pulex</i>                              | NAPX | 40.00 | -86.00  | Indiana                      | USA       | Omilian et al. 2008   | PA27_IN   |
| IN-07  | EU918467, EU918468           |                              |          | <i>D. pulex</i>                              | NAPX | 40.00 | -86.00  | Indiana                      | USA       | Omilian et al. 2008   | PA35_IN   |
| IN-08  |                              | JN117759, JN117760           |          | Hybrid <i>D. pulicaria</i> X <i>D. pulex</i> | NAPX | 39.12 | -87.31  | Indiana                      | USA       | Crease et al. 2011    | CX07_IN   |
| IN-09  |                              | JN117779                     |          | <i>D.pulex</i>                               | NAPX | 39.90 | -84.93  | Indiana                      | USA       | Crease et al. 2011    | X10_IN    |
| IN-10  |                              | JN117780, JN117781           |          | <i>D.pulex</i>                               | NAPX | 40.22 | -87.33  | Indiana                      | USA       | Crease et al. 2011    | X11_IN    |
| ISL-01 | KC536408, KC536409           | KC536038, KC536039, KC536040 | KC536585 | <i>D. pulicaria</i>                          | EPC  | 64.14 | -21.94  | Reykjavik                    | Iceland   | this paper            | DP131_001 |
| ISL-02 |                              |                              | KC536585 | <i>D. pulicaria</i>                          | EPC  | 64.14 | -21.94  | Reykjavik                    | Iceland   | this paper            | DP131_002 |
| ISL-03 |                              |                              | KC536585 | <i>D. pulicaria</i>                          | EPC  | 64.14 | -21.94  | Reykjavik                    | Iceland   | this paper            | DP131_003 |
| ISL-04 | KC536496, KC536497, KC536498 | KC536128, KC536129           | KC536621 | <i>D. pulicaria</i>                          | NAPC | 64.13 | -21.94  | Reykjavik                    | Iceland   | this paper            | L2        |
| ISL-05 |                              | JN117734, JN117751           |          | Hybrid <i>D. pulicaria</i> X <i>D. pulex</i> | NAPC | 64.09 | -21.58  | Reykjavik                    | Iceland   | Crease et al. 2011    | CX01_ICE  |
| ITA-01 | KC536217, KC536218           | KC535981, KC535982           | KC536525 | <i>D. pulicaria</i>                          | EPC  | 46.48 | 11.66   | Dolomites                    | Italy     | this paper            | DP024_002 |
| ITA-02 | KC536219, KC536220           |                              | KC536525 | <i>D. pulicaria</i>                          | EPC  | 46.48 | 11.66   | Dolomites                    | Italy     | this paper            | DP024_005 |
| ITA-03 | KC536221, KC536222           |                              | KC536525 | <i>D. pulicaria</i>                          | EPC  | 46.48 | 11.66   | Dolomites                    | Italy     | this paper            | DP024_006 |
| ITA-04 | KC536223, KC536224           |                              | KC536525 | <i>D. pulicaria</i>                          | EPC  | 46.48 | 11.66   | Dolomites                    | Italy     | this paper            | DP024_007 |
| ITA-05 | KC536225, KC536226           |                              | KC536525 | <i>D. pulicaria</i>                          | EPC  | 46.48 | 11.66   | Dolomites                    | Italy     | this paper            | DP024_008 |
| ITA-06 |                              |                              | KC536525 | <i>D. pulicaria</i>                          | EPC  | 46.48 | 11.66   | Dolomites                    | Italy     | this paper            | DP024_009 |
| ITA-06 | KC536363, KC536364           |                              | KC536565 | Hybrid <i>D. pulicaria</i> X <i>D. pulex</i> | NAPX | 45.07 | 7.39    | Avigliana                    | Italy     | this paper            | DP085_001 |
| ITA-07 | KC536365, KC536366           | KC536010, KC536011           | KC536565 | Hybrid <i>D. pulicaria</i> X <i>D. pulex</i> | NAPX | 45.07 | 7.39    | Avigliana                    | Italy     | this paper            | DP085_003 |
| ITA-08 |                              |                              | KC536565 | Hybrid <i>D. pulicaria</i> X <i>D. pulex</i> | NAPX | 45.07 | 7.39    | Avigliana                    | Italy     | this paper            | DP085_004 |
| ITA-09 |                              |                              | KC536565 | Hybrid <i>D. pulicaria</i> X <i>D. pulex</i> | NAPX | 45.07 | 7.39    | Avigliana                    | Italy     | this paper            | DP085_005 |
| ITA-10 |                              |                              | KC536563 | <i>D. pulicaria</i>                          | EPC  | 45.07 | 7.39    | Avigliana                    | Italy     | this paper            | DP085_010 |
| ITA-11 |                              |                              | KC536565 | Hybrid <i>D. pulicaria</i> X <i>D. pulex</i> | NAPX | 45.07 | 7.39    | Avigliana                    | Italy     | this paper            | DP085_011 |
| ITA-12 |                              |                              | KC536565 | Hybrid <i>D. pulicaria</i> X <i>D. pulex</i> | NAPX | 45.07 | 7.39    | Avigliana                    | Italy     | this paper            | DP085_012 |
| ITA-13 |                              |                              | KC536565 | Hybrid <i>D. pulicaria</i> X <i>D. pulex</i> | NAPX | 45.07 | 7.39    | Avigliana                    | Italy     | this paper            | DP085_013 |
| ITA-14 | KC536367, KC536368           | KC536570                     |          | Hybrid <i>D. pulicaria</i> X <i>D. pulex</i> | NAPX | 45.07 | 7.39    | Avigliana                    | Italy     | this paper            | DP100_003 |
| ITA-15 | KC536369, KC536370           |                              | KC536565 | Hybrid <i>D. pulicaria</i> X <i>D. pulex</i> | NAPX | 45.07 | 7.39    | Avigliana                    | Italy     | this paper            | DP101_001 |
| ITA-16 |                              |                              | KC536565 | Hybrid <i>D. pulicaria</i> X <i>D. pulex</i> | NAPX | 45.07 | 7.39    | Avigliana                    | Italy     | this paper            | DP101_002 |
| ITA-17 |                              |                              | KC536565 | Hybrid <i>D. pulicaria</i> X <i>D. pulex</i> | NAPX | 45.07 | 7.39    | Avigliana                    | Italy     | this paper            | DP101_003 |
| ITA-18 | KC536371, KC536372           | KC536069, KC536070           | KC536594 | Hybrid <i>D. pulicaria</i> X <i>D. pulex</i> | NAPX | 45.07 | 7.39    | Avigliana                    | Italy     | this paper            | DP166_001 |
| ITA-19 | KC536373, KC536374           |                              | KC536565 | Hybrid <i>D. pulicaria</i> X <i>D. pulex</i> | NAPX | 45.07 | 7.39    | Avigliana                    | Italy     | this paper            | DP166_002 |
| ITA-20 |                              |                              |          | Hybrid <i>D. pulicaria</i> X <i>D. pulex</i> | NAPX | 40.56 | 9.32    | Sardinia                     | Italy     | this paper            | DP102_002 |
| ITA-21 |                              |                              | KC536565 | Hybrid <i>D. pulicaria</i> X <i>D. pulex</i> | NAPX | 40.56 | 9.32    | Sardinia                     | Italy     | this paper            | DP102_003 |

|        |                              |                              |          |                                              |      |       |         |                     |            |                       |           |
|--------|------------------------------|------------------------------|----------|----------------------------------------------|------|-------|---------|---------------------|------------|-----------------------|-----------|
| ITA-22 |                              |                              | KC536565 | Hybrid <i>D. pulicaria</i> X <i>D. pulex</i> | NAPX | 40.56 | 9.32    | Sardinia            | Italy      | this paper            | DP102_004 |
| KGZ-01 |                              |                              | KC536566 | <i>D. pulicaria</i>                          | NAPC | 42.36 | 73.80   | Kara Balta          | Kyrgyzstan | this paper            | DP087_001 |
| KGZ-02 | KC536375, KC536376           | KC536012                     | KC536567 | <i>D. pulicaria</i>                          | NAPC | 42.36 | 73.80   | Kara Balta          | Kyrgyzstan | this paper            | DP087_002 |
| KGZ-03 | KC536377, KC536378           | KC536013, KC536014           | KC536566 | <i>D. pulicaria</i>                          | NAPC | 42.36 | 73.80   | Kara Balta          | Kyrgyzstan | this paper            | DP087_003 |
| KGZ-04 |                              |                              | KC536568 | <i>D. pulicaria</i>                          | NAPC | 42.36 | 73.80   | Kara Balta          | Kyrgyzstan | this paper            | DP087_004 |
| KGZ-05 | KC536379, KC536380           |                              | KC536566 | <i>D. pulicaria</i>                          | NAPC | 42.36 | 73.80   | Kara Balta          | Kyrgyzstan | this paper            | DP087_005 |
| KGZ-06 |                              |                              | KC536566 | <i>D. pulicaria</i>                          | NAPC | 42.36 | 73.80   | Kara Balta          | Kyrgyzstan | this paper            | DP087_006 |
| KGZ-07 |                              |                              | KC536566 | <i>D. pulicaria</i>                          | NAPC | 42.36 | 73.80   | Kara Balta          | Kyrgyzstan | this paper            | DP087_010 |
| KGZ-08 |                              |                              | KC536566 | <i>D. pulicaria</i>                          | NAPC | 42.36 | 73.80   | Kara Balta          | Kyrgyzstan | this paper            | DP087_011 |
| LTU-01 | KC536339, KC536340           |                              | KC536560 | <i>D. pulex</i>                              | EPX  | 54.75 | 25.29   | Vilnius             | Lithuania  | this paper            | DP081_001 |
| LTU-02 |                              |                              | KC536561 | <i>D. pulex</i>                              | EPX  | 54.75 | 25.29   | Vilnius             | Lithuania  | this paper            | DP081_002 |
| LTU-03 |                              |                              |          | <i>D. pulex</i>                              | EPX  | 54.75 | 25.29   | Vilnius             | Lithuania  | this paper            | DP081_003 |
| LTU-04 | KC536341, KC536342           | KC536008, KC536009           | KC536562 | <i>D. pulex</i>                              | EPX  | 54.69 | 25.24   | Vilnius             | Lithuania  | this paper            | DP082_002 |
| LTU-05 |                              |                              | KC536561 | <i>D. pulex</i>                              | EPX  | 54.69 | 25.24   | Vilnius             | Lithuania  | this paper            | DP082_003 |
| LTU-06 |                              |                              | KC536561 | <i>D. pulex</i>                              | EPX  | 54.69 | 25.24   | Vilnius             | Lithuania  | this paper            | DP082_004 |
| MB-01  | KC536464, KC536465           | KC536093, KC536094           | KC536604 | <i>D. pulex</i>                              | NAPX | 58.77 | -94.17  | Churchill, Manitoba | Canada     | this paper            | DX016_001 |
| MB-02  | KC536468, KC536469, KC536470 | KC536096, KC536097, KC536098 | KC536605 | <i>D. tenebrosa</i>                          | TEN  | 58.77 | -94.17  | Churchill, Manitoba | Canada     | this paper            | DX018_001 |
| MB-03  | KC536483, KC536484, KC536485 | KC536107, KC536108, KC536109 | KC536610 | <i>D. middendorffiana</i>                    | MID  | 58.78 | -94.19  | Churchill, Manitoba | Canada     | this paper            | DX022_001 |
| MB-04  |                              |                              | KC536610 | <i>D. middendorffiana</i>                    | MID  | 58.78 | -94.19  | Churchill, Manitoba | Canada     | this paper            | DX022_002 |
| MB-05  |                              |                              | KC536610 | <i>D. middendorffiana</i>                    | MID  | 58.78 | -94.19  | Churchill, Manitoba | Canada     | this paper            | DX022_003 |
| MB-06  | KC536486, KC536487           | KC536110, KC536111           | KC536611 | <i>D. pulicaria</i>                          | NAPC | 52.12 | -97.25  | Winnipeg, Manitoba  | Canada     | this paper            | DX023_001 |
| MB-07  |                              |                              | KC536611 | <i>D. pulicaria</i>                          | NAPC | 52.12 | -97.25  | Winnipeg, Manitoba  | Canada     | this paper            | DX023_002 |
| MB-08  |                              | KC536112, KC536113           | KC536612 | <i>D. tenebrosa</i>                          | TEN  | 58.74 | -93.96  | Churchill, Manitoba | Canada     | this paper            | DX024_001 |
| MB-09  | KC536488, KC536489           |                              | KC536612 | <i>D. tenebrosa</i>                          | TEN  | 58.74 | -93.96  | Churchill, Manitoba | Canada     | this paper            | DX024_002 |
| MB-10  | KC536490, KC536491           | KC536114, KC536115           | KC536613 | <i>D. tenebrosa</i>                          | TEN  | 58.77 | -93.97  | Churchill, Manitoba | Canada     | this paper            | DX025_001 |
| MB-11  |                              |                              | KC536613 | <i>D. tenebrosa</i>                          | TEN  | 58.77 | -93.97  | Churchill, Manitoba | Canada     | this paper            | DX025_002 |
| MB-12  | KC536492, KC536493           | KC536116, KC536117, KC536118 | KC536610 | <i>D. middendorffiana</i>                    | MID  | 58.78 | -94.19  | Churchill, Manitoba | Canada     | this paper            | DX026_001 |
| MB-13  |                              |                              | KC536610 | <i>D. middendorffiana</i>                    | MID  | 58.78 | -94.19  | Churchill, Manitoba | Canada     | this paper            | DX026_002 |
| MB-14  |                              |                              | KC536610 | <i>D. middendorffiana</i>                    | MID  | 58.78 | -94.19  | Churchill, Manitoba | Canada     | this paper            | DX026_003 |
| MB-15  |                              |                              | KC536614 | <i>D. pulicaria</i>                          | NAPC | 58.77 | -94.17  | Churchill, Manitoba | Canada     | this paper            | A20_001   |
| MB-16  | KC536132, KC536133, KC536134 |                              | KC536614 | <i>D. pulicaria</i>                          | NAPC | 58.77 | -94.17  | Churchill, Manitoba | Canada     | this paper            | A20_003   |
| MB-17  | KC536449, KC536450           |                              | KC536619 | <i>D. tenebrosa</i>                          | TEN  | 58.77 | -94.17  | Churchill, Manitoba | Canada     | this paper            | T59       |
| MB-18  | HQ434691                     |                              | FJ591107 | <i>D. pulex</i>                              | NAPX | 58.73 | -94.09  | Churchill, Manitoba | Canada     | Vergilino et al. 2011 | A17_200   |
| MB-19  | HQ434698                     |                              | FJ591106 | Hybrid <i>D. pulicaria</i> X <i>D. pulex</i> | NAPC | 58.73 | -94.09  | Churchill, Manitoba | Canada     | Vergilino et al. 2011 | B141_202  |
| MB-20  | HQ434709, HQ434710, HQ434711 |                              | FJ591116 | <i>D. tenebrosa</i>                          | TEN  | 58.77 | -94.18  | Churchill, Manitoba | Canada     | Vergilino et al. 2011 | Clone_B   |
| MB-21  | HQ434712                     |                              | FJ591119 | <i>D. tenebrosa</i>                          | TEN  | 58.77 | -94.18  | Churchill, Manitoba | Canada     | Vergilino et al. 2011 | Clone_D   |
| MB-22  | HQ434713                     |                              | FJ591118 | <i>D. tenebrosa</i>                          | TEN  | 58.77 | -94.18  | Churchill, Manitoba | Canada     | Vergilino et al. 2011 | Clone_E   |
| MB-23  | HQ434760                     |                              | HQ434689 | <i>D. pulicaria</i>                          | NAPC | 49.90 | -97.15  | Winnipeg, Manitoba  | Canada     | Vergilino et al. 2011 | winni1    |
| MB-24  |                              | JN117740, JN117735           |          | <i>D. pulicaria</i>                          | NAPX | 49.16 | -96.30  | Manitoba            | Canada     | Crease et al. 2011    | C15_MB    |
| MB-25  |                              | JN117743, JN117740           |          | <i>D. pulicaria</i>                          | NAPX | 50.04 | -100.32 | Manitoba            | Canada     | Crease et al. 2011    | C16_MB    |
| MB-26  |                              | JN117745, JN117746, JN117740 |          | <i>D. middendorffiana</i>                    | MID  | 58.46 | -93.51  | Manitoba            | Canada     | Crease et al. 2011    | MID01_MB  |
| MB-27  |                              | JN117740, JN117765           |          | Hybrid <i>D. pulicaria</i> X <i>D. pulex</i> | NAPX | 49.64 | -98.24  | Manitoba            | Canada     | Crease et al. 2011    | CX15_MB   |
| MB-28  |                              | JN117766, JN117767           |          | Hybrid <i>D. pulicaria</i> X <i>D. pulex</i> | NAPX | 49.64 | -98.24  | Manitoba            | Canada     | Crease et al. 2011    | CX16_MB   |
| ME-01  | EU918529, EU918530           |                              |          | <i>D. pulicaria</i>                          | NAPC | 44.84 | -69.28  | Maine               | USA        | Omilian et al. 2008   | MOOSE_ME  |
| ME-02  | EU918445, EU918446           |                              |          | <i>D. pulex</i>                              | NAPX | 44.84 | -69.28  | Maine               | USA        | Omilian et al. 2008   | PHM1_ME   |
| ME-03  | EU918453, EU918454           |                              |          | <i>D. pulex</i>                              | NAPX | 44.84 | -69.28  | Maine               | USA        | Omilian et al. 2008   | TRO3_ME   |
| ME-04  |                              | JN117734                     |          | <i>D. pulicaria</i>                          | NAPC | 44.84 | -69.28  | Maine               | USA        | Crease et al. 2011    | C02_ME    |
| ME-05  |                              | JN117740, JN117754           |          | Hybrid <i>D. pulicaria</i> X <i>D. pulex</i> | NAPX | 42.99 | -70.61  | Maine               | USA        | Crease et al. 2011    | CX04_ME   |
| ME-06  |                              | JN117740, JN117756           |          | Hybrid <i>D. pulicaria</i> X <i>D. pulex</i> | NAPX | 44.86 | -69.80  | Maine               | USA        | Crease et al. 2011    | CX10_ME   |
| ME-07  |                              | JN117761                     |          | <i>D. pulex</i>                              | NAPX | 46.50 | -68.22  | Maine               | USA        | Crease et al. 2011    | X26_ME    |
| ME-08  |                              | JN117761, JN117783           |          | <i>D. pulex</i>                              | NAPX | 44.63 | -69.23  | Maine               | USA        | Crease et al. 2011    | X29_ME    |
| MI-01  | HQ434732                     |                              | HQ434655 | Hybrid <i>D. pulicaria</i> X <i>D. pulex</i> | NAPX | 44.00 | -85.00  | Michigan            | USA        | Vergilino et al. 2011 | IWR10     |
| MI-02  | EU918531, EU918532           |                              |          | <i>D. pulicaria</i>                          | NAPC | 44.00 | -85.00  | Michigan            | USA        | Omilian et al. 2008   | BAKER_MI  |
| MI-03  | EU918431, EU918432           |                              |          | <i>D. pulex</i>                              | NAPX | 44.00 | -85.00  | Michigan            | USA        | Omilian et al. 2008   | CR1_MI    |
| MI-04  | EU918533, EU918534           |                              |          | <i>D. pulicaria</i>                          | NAPC | 42.65 | -85.50  | Michigan            | USA        | Omilian et al. 2008   | LL_MI     |

|        |                              |                              |          |                                              |         |       |         |                        |             |                       |           |
|--------|------------------------------|------------------------------|----------|----------------------------------------------|---------|-------|---------|------------------------|-------------|-----------------------|-----------|
| MI-05  | EU918439, EU918440           |                              |          | <i>D. pulex</i>                              | NAPX    | 42.65 | -85.50  | Michigan               | USA         | Omilian et al. 2008   | LYT1_MI   |
| MI-06  | EU918469, EU918470           |                              |          | <i>D. pulex</i>                              | NAPX    | 42.65 | -85.50  | Michigan               | USA         | Omilian et al. 2008   | MAR6_MI   |
| MI-07  | EU918471, EU918472           |                              |          | <i>D. pulex</i>                              | NAPX    | 42.65 | -85.50  | Michigan               | USA         | Omilian et al. 2008   | MAR8_MI   |
| MI-08  | EU918473, EU918474           |                              |          | <i>D. pulex</i>                              | NAPX    | 42.65 | -85.50  | Michigan               | USA         | Omilian et al. 2008   | NDB3_MI   |
| MI-09  | EU918475, EU918476           |                              |          | <i>D. pulex</i>                              | NAPX    | 42.65 | -85.50  | Michigan               | USA         | Omilian et al. 2008   | NDB4_MI   |
| MI-10  |                              | JN117735                     |          | <i>D. pulicaria</i>                          | NAPC    | 42.65 | -85.50  | Michigan               | USA         | Crease et al. 2011    | C03_MI    |
| MI-11  |                              | JN117740, JN117753           |          | Hybrid <i>D. pulicaria</i> X <i>D. pulex</i> | NAPX    | 42.21 | -83.70  | Michigan               | USA         | Crease et al. 2011    | CX03_MI   |
| MI-12  |                              | JN117755, JN117754           |          | Hybrid <i>D. pulicaria</i> X <i>D. pulex</i> | NAPX    | 42.17 | -83.72  | Michigan               | USA         | Crease et al. 2011    | CX11_MI   |
| MI-13  |                              | JN117768, JN117769           |          | <i>D.pulex</i>                               | NAPX    | 42.19 | -83.58  | Michigan               | USA         | Crease et al. 2011    | X01_MI    |
| MI-14  |                              | JN117782, JN117768           |          | <i>D.pulex</i>                               | NAPX    | 42.75 | -85.35  | Michigan               | USA         | Crease et al. 2011    | X12_MI    |
| MI-15  |                              | JN117783, JN117778           |          | <i>D.pulex</i>                               | NAPX    | 42.20 | -83.72  | Michigan               | USA         | Crease et al. 2011    | X13_MI    |
| MI-16  |                              | JN117768, JN117778           |          | <i>D.pulex</i>                               | NAPX    | 42.33 | -83.66  | Michigan               | USA         | Crease et al. 2011    | X16_MI    |
| MI-17  |                              | JN117783, JN117761           |          | <i>D.pulex</i>                               | NAPX    | 46.06 | -86.79  | Michigan               | USA         | Crease et al. 2011    | X19_MI    |
| MI-18  |                              | JN117761                     |          | <i>D.pulex</i>                               | NAPX    | 46.01 | -86.66  | Michigan               | USA         | Crease et al. 2011    | X24_MI    |
| MN-01  | EU918441, EU918442           |                              |          | <i>D. pulex</i>                              | NAPX    | 46.00 | -94.00  | Minnesota              | USA         | Omilian et al. 2008   | NOS1_MN   |
| MN-02  | EU918477, EU918478           |                              |          | <i>D. pulex</i>                              | NAPX    | 46.00 | -94.00  | Minnesota              | USA         | Omilian et al. 2008   | MPP1_MN   |
| MN-03  | EU918479, EU918480           |                              |          | <i>D. pulex</i>                              | NAPX    | 46.00 | -94.00  | Minnesota              | USA         | Omilian et al. 2008   | MPP3_MN   |
| MN-04  | EU918481, EU918482           |                              |          | <i>D. pulex</i>                              | NAPX    | 46.00 | -94.00  | Minnesota              | USA         | Omilian et al. 2008   | EB1_MN    |
| MN-05  | EU918483, EU918484           |                              |          | <i>D. pulex</i>                              | NAPX    | 46.00 | -94.00  | Minnesota              | USA         | Omilian et al. 2008   | EB4_MN    |
| MN-06  |                              | JN117761, JN117775           |          | <i>D.pulex</i>                               | NAPX    | 44.97 | -93.32  | Minnesota              | USA         | Crease et al. 2011    | X06_MN    |
| MN-07  |                              | JN117791, JN117792           |          | <i>D.pulex</i>                               | NAPX    | 47.29 | -92.49  | Minnesota              | USA         | Crease et al. 2011    | X25_MN    |
| MNE-01 | KC536227, KC536228           | KC535983, KC535984           | KC536526 | <i>D. pulicaria</i>                          | EPC     | 43.12 | 19.04   | Durmintor              | Monte Negro | this paper            | DP035_001 |
| MNE-02 | KC536229, KC536230           |                              | KC536527 | <i>D. pulicaria</i>                          | EPC     | 43.12 | 19.04   | Durmintor              | Monte Negro | this paper            | DP035_005 |
| MNE-03 | KC536231, KC536232           |                              | KC536527 | <i>D. pulicaria</i>                          | EPC     | 43.12 | 19.04   | Durmintor              | Monte Negro | this paper            | DP035_006 |
| MNE-04 | KC536233, KC536234           |                              | KC536528 | <i>D. pulicaria</i>                          | EPC     | 43.12 | 19.04   | Durmintor              | Monte Negro | this paper            | DP035_007 |
| MNE-05 | KC536235, KC536236           |                              | KC536527 | <i>D. pulicaria</i>                          | EPC     | 43.12 | 19.04   | Durmintor              | Monte Negro | this paper            | DP035_008 |
| MNE-06 |                              |                              | KC536527 | <i>D. pulicaria</i>                          | EPC     | 43.12 | 19.04   | Durmintor              | Monte Negro | this paper            | DP035_009 |
| NB-01  |                              | JN117755, JN117756           |          | Hybrid <i>D. pulicaria</i> X <i>D. pulex</i> | NAPX    | 47.00 | -67.47  | New Brunswick          | Canada      | Crease et al. 2011    | CX05_NB   |
| NB-02  |                              | JN117757, JN117758           |          | Hybrid <i>D. pulicaria</i> X <i>D. pulex</i> | NAPX    | 47.00 | -67.47  | New Brunswick          | Canada      | Crease et al. 2011    | CX06_NB   |
| NB-03  |                              | JN117735, JN117762           |          | Hybrid <i>D. pulicaria</i> X <i>D. pulex</i> | NAPX    | 47.62 | -65.67  | New Brunswick          | Canada      | Crease et al. 2011    | CX12_NB   |
| NOR-01 | KC536287, KC536288           | KC535992, KC535993           | KC536539 | <i>D. pulicaria</i>                          | EPC     | 60.28 | 7.53    | Hardangervidda         | Norway      | this paper            | DP042_001 |
| NOR-02 | KC536289, KC536290           |                              | KC536539 | <i>D. pulicaria</i>                          | EPC     | 60.28 | 7.53    | Hardangervidda         | Norway      | this paper            | DP042_002 |
| NOR-03 | KC536291, KC536292           |                              | KC536540 | <i>D. pulicaria</i>                          | EPC     | 60.28 | 7.53    | Hardangervidda         | Norway      | this paper            | DP042_003 |
| NU-01  | KC536135, KC536136           |                              |          | <i>D. pulicaria</i>                          | missing | 72.90 | -79.85  | Bylot Island, Nunavut  | Canada      | this paper            | B_003     |
| NU-02  | KC536137, KC536138           | KC536121, KC536122, KC536123 | KC536617 | <i>D. pulicaria</i>                          | NAPC    | 72.90 | -79.85  | Bylot Island, Nunavut  | Canada      | this paper            | B_004     |
| NU-03  |                              |                              | KC536617 | <i>D. pulicaria</i>                          | NAPC    | 72.90 | -79.85  | Bylot Island, Nunavut  | Canada      | this paper            | B_005     |
| NU-04  |                              |                              | KC536617 | <i>D. pulicaria</i>                          | NAPC    | 72.90 | -79.85  | Bylot Island, Nunavut  | Canada      | this paper            | B_006     |
| NU-05  |                              |                              | KC536617 | <i>D. pulicaria</i>                          | NAPC    | 72.90 | -79.85  | Bylot Island, Nunavut  | Canada      | this paper            | B_007     |
| NU-06  |                              |                              | KC536617 | <i>D. pulicaria</i>                          | NAPC    | 72.90 | -79.85  | Bylot Island, Nunavut  | Canada      | this paper            | B_008     |
| NU-07  |                              | JN117745, JN117747           |          | <i>D. middendorffiana</i>                    | MID     | 72.68 | -77.94  | Nunavut                | Canada      | Crease et al. 2011    | MID02     |
| NU-08  |                              | JN117914, JN117915           |          | <i>D. tenebrosa</i>                          | TEN     | 70.29 | -127.50 | Nunavut                | Canada      | Crease et al. 2011    | TEN_NUN   |
| NY-01  | EU918429, EU918430           |                              |          | <i>D. pulex</i>                              | NAPX    | 44.00 | -74.00  | New York               | USA         | Omilian et al. 2008   | AST1_NY   |
| NY-02  |                              | JN117787, JN117778           |          | <i>D.pulex</i>                               | NAPX    | 42.98 | -78.77  | New York               | USA         | Crease et al. 2011    | X18_NY    |
| NY-03  |                              | JN117778                     |          | <i>D.pulex</i>                               | NAPX    | 42.47 | -76.37  | New York               | USA         | Crease et al. 2011    | X27_NY    |
| NT-01  |                              | JN117740, JN117763           |          | Hybrid <i>D. pulicaria</i> X <i>D. pulex</i> | NAPX    | 69.43 | -133.02 | Northwest Territories  | Canada      | Crease et al. 2011    | CX13_NT   |
| OH-01  | EU918455, EU918456           |                              |          | <i>D.pulex</i>                               | NAPX    | 40.20 | -82.60  | Ohio                   | USA         | Omilian et al. 2008   | WCH1_OH   |
| OH-02  |                              | JN117762, JN117795           |          | <i>D.pulex</i>                               | NAPX    | 41.34 | -81.16  | Ohio                   | USA         | Crease et al. 2011    | X30_OH    |
| ON-01  | KC536451, KC536452, KC536453 |                              | KC536565 | Hybrid <i>D. pulicaria</i> X <i>D. pulex</i> | NAPX    | 42.22 | -83.03  | Disputed Road, Ontario | Canada      | this paper            | DX010_001 |
| ON-02  | KC536460, KC536461           | KC536089, KC536090           | KC536602 | <i>D. pulex</i>                              | NAPX    | 43.73 | -80.95  | Listowel pond, Ontario | Canada      | this paper            | DX014_001 |
| ON-03  | HQ434719                     |                              | HQ434640 | <i>D. pulex</i>                              | NAPX    | 42.22 | -83.03  | Disputed Road, Ontario | Canada      | Vergilino et al. 2011 | Disp13    |
| ON-04  | HQ434700                     |                              | HQ434632 | <i>D. pulex</i>                              | NAPX    | 52.20 | -87.30  | Windsor, Ontario       | Canada      | Vergilino et al. 2011 | Can2_1    |
| ON-05  | HQ434729                     |                              | HQ434649 | Hybrid <i>D. pulicaria</i> X <i>D. pulex</i> | NAPX    | 52.20 | -87.30  | Windsor, Ontario       | Canada      | Vergilino et al. 2011 | Fence1    |
| ON-06  | EU918437, EU918438           |                              |          | <i>D. pulex</i>                              | NAPX    | 45.10 | -77.97  | Ontario                | Canada      | Omilian et al. 2008   | Hughes2   |
| ON-07  | EU918541, EU918542           |                              |          | <i>D. pulicaria</i>                          | NAPC    | 45.10 | -77.97  | Ontario                | Canada      | Omilian et al. 2008   | MINER_ONT |
| ON-08  | EU918443, EU918444           |                              |          | <i>D. pulex</i>                              | NAPX    | 45.10 | -77.97  | Ontario                | Canada      | Omilian et al. 2008   | PETE1_ON  |

|        |                    |                    |          |                                              |         |        |         |                        |        |                       |            |
|--------|--------------------|--------------------|----------|----------------------------------------------|---------|--------|---------|------------------------|--------|-----------------------|------------|
| ON-09  | EU918447, EU918448 |                    |          | <i>D. pulex</i>                              | NAPX    | 45.10  | -77.97  | Ontario                | Canada | Omilian et al. 2008   | RONIII_ONT |
| ON-10  |                    | JN117733           |          | <i>D. pulicaria</i>                          | NAPC    | 44.88  | -78.75  | Ontario                | Canada | Crease et al. 2011    | C01_ON     |
| ON-11  |                    | JN117740, JN117761 |          | Hybrid <i>D. pulicaria</i> X <i>D. pulex</i> | NAPX    | 42.12  | -82.98  | Ontario                | Canada | Crease et al. 2011    | CX08_ON    |
| ON-12  |                    | JN117740, JN117761 |          | Hybrid <i>D. pulicaria</i> X <i>D. pulex</i> | NAPX    | 42.16  | -83.02  | Ontario                | Canada | Crease et al. 2011    | CX09_ON    |
| ON-13  |                    | JN117735, JN117764 |          | Hybrid <i>D. pulicaria</i> X <i>D. pulex</i> | NAPX    | 49.82  | -93.23  | Ontario                | Canada | Crease et al. 2011    | CX14_ON    |
| ON-14  |                    | JN117774           |          | <i>D. pulex</i>                              | NAPX    | 42.17  | -83.03  | Ontario                | Canada | Crease et al. 2011    | X05_ON     |
| ON-15  |                    | JN117761           |          | <i>D. pulex</i>                              | NAPX    | 42.25  | -83.02  | Ontario                | Canada | Crease et al. 2011    | X07_ON     |
| ON-16  |                    | JN117778           |          | <i>D. pulex</i>                              | NAPX    | 42.67  | -80.40  | Ontario                | Canada | Crease et al. 2011    | X09_ON     |
| ON-17  |                    | JN117783           |          | <i>D. pulex</i>                              | NAPX    | 43.54  | -80.21  | Ontario                | Canada | Crease et al. 2011    | X17_ON     |
| ON-18  |                    | JN117793, JN117794 |          | <i>D. pulex</i>                              | NAPX    | 42.33  | -81.84  | Ontario                | Canada | Crease et al. 2011    | X28_ON     |
| ON-19  |                    | JN117771           |          | <i>D. pulex</i>                              | NAPX    | 49.82  | -93.23  | Ontario                | Canada | Crease et al. 2011    | X31_ON     |
| OR-01  | KC536441, KC536442 | KC536077, KC536078 | KC536595 | <i>D. arenata</i>                            | ARE     | 44.00  | -123.00 | Oregon                 | USA    | this paper            | DP170_001  |
| OR-02  | KC536443, KC536444 |                    | KC536596 | <i>D. arenata</i>                            | ARE     | 44.00  | -123.00 | Oregon                 | USA    | this paper            | DP171_001  |
| OR-03  | KC536445, KC536446 | KC536079, KC536080 | KC536597 | <i>D. melanica</i>                           | MEL     | 44.00  | -123.00 | Oregon                 | USA    | this paper            | DP172_001  |
| OR-04  | KC536447, KC536448 | KC536081, KC536082 | KC536598 | <i>D. melanica</i>                           | MEL     | 44.00  | -123.00 | Oregon                 | USA    | this paper            | DP173_001  |
| OR-05  | EU918485, EU918486 |                    |          | <i>D. arenata</i>                            | ARE     | 44.00  | -123.00 | Oregon                 | USA    | Omilian et al. 2008   | Amaz1_OR   |
| OR-06  | EU918487, EU918488 |                    |          | <i>D. arenata</i>                            | ARE     | 44.00  | -123.00 | Oregon                 | USA    | Omilian et al. 2008   | Amaz2_OR   |
| OR-07  | EU918489, EU918490 |                    |          | <i>D. arenata</i>                            | ARE     | 44.00  | -123.00 | Oregon                 | USA    | Omilian et al. 2008   | CC3_OR     |
| OR-08  | EU918491, EU918492 |                    |          | <i>D. arenata</i>                            | ARE     | 44.00  | -123.00 | Oregon                 | USA    | Omilian et al. 2008   | CC6_OR     |
| OR-09  | EU918493, EU918494 |                    |          | <i>D. arenata</i>                            | ARE     | 44.00  | -123.00 | Oregon                 | USA    | Omilian et al. 2008   | CC7_OR     |
| OR-10  | EU918515, EU918516 |                    |          | <i>D. pulex</i>                              | NAPX    | 44.00  | -123.00 | Oregon                 | USA    | Omilian et al. 2008   | GI2_OR     |
| OR-11  | EU918517, EU918518 |                    |          | <i>D. pulex</i>                              | NAPX    | 44.00  | -123.00 | Oregon                 | USA    | Omilian et al. 2008   | GI3_OR     |
| OR-12  | EU918519, EU918520 |                    |          | <i>D. pulex</i>                              | NAPX    | 44.00  | -123.00 | Oregon                 | USA    | Omilian et al. 2008   | GI8_OR     |
| OR-13  | EU918521, EU918522 |                    |          | <i>D. pulex</i>                              | NAPX    | 44.00  | -123.00 | Oregon                 | USA    | Omilian et al. 2008   | GI9_OR     |
| OR-14  | EU918523, EU918524 |                    |          | <i>D. pulex</i>                              | NAPX    | 44.00  | -123.00 | Oregon                 | USA    | Omilian et al. 2008   | GI11_OR    |
| OR-15  | EU918525, EU918526 |                    |          | <i>D. pulex</i>                              | NAPX    | 44.00  | -123.00 | Oregon                 | USA    | Omilian et al. 2008   | GI13_OR    |
| OR-16  | EU918503, EU918504 |                    |          | <i>D. arenata</i>                            | ARE     | 44.00  | -123.00 | Oregon                 | USA    | Omilian et al. 2008   | LOG13_OR   |
| OR-17  | EU918505, EU918506 |                    |          | <i>D. arenata</i>                            | ARE     | 44.00  | -123.00 | Oregon                 | USA    | Omilian et al. 2008   | LOG18_OR   |
| OR-18  | EU918507, EU918508 |                    |          | <i>D. arenata</i>                            | ARE     | 44.00  | -123.00 | Oregon                 | USA    | Omilian et al. 2008   | LOG29_OR   |
| OR-19  | EU918509, EU918510 |                    |          | <i>D. arenata</i>                            | ARE     | 44.00  | -123.00 | Oregon                 | USA    | Omilian et al. 2008   | LOG50_OR   |
| OR-20  | EU918513, EU918514 |                    |          | Hybrid <i>D. pulicaria</i> X <i>D. pulex</i> | NAPX    | 44.00  | -123.00 | Oregon                 | USA    | Omilian et al. 2008   | LOG52_OR   |
| OR-21  | EU918511, EU918512 |                    |          | <i>D. arenata</i>                            | ARE     | 44.00  | -123.00 | Oregon                 | USA    | Omilian et al. 2008   | LOG69_OR   |
| OR-22  | EU918535, EU918536 |                    |          | <i>D. pulicaria</i>                          | NAPC    | 44.00  | -123.00 | Oregon                 | USA    | Omilian et al. 2008   | LOSTCR_OR  |
| OR-23  | EU918495, EU918496 |                    |          | <i>D. arenata</i>                            | ARE     | 44.00  | -123.00 | Oregon                 | USA    | Omilian et al. 2008   | OP1_OR     |
| OR-24  | EU918497, EU918498 |                    |          | <i>D. arenata</i>                            | ARE     | 44.00  | -123.00 | Oregon                 | USA    | Omilian et al. 2008   | OP10_OR    |
| OR-25  | EU918499, EU918500 |                    |          | <i>D. arenata</i>                            | ARE     | 44.00  | -123.00 | Oregon                 | USA    | Omilian et al. 2008   | OP11_OR    |
| OR-26  | EU918501, EU918502 |                    |          | <i>D. arenata</i>                            | ARE     | 44.00  | -123.00 | Oregon                 | USA    | Omilian et al. 2008   | OP103_OR   |
| OR-27  |                    | JN117725           |          | <i>D. arenata</i>                            | ARE     | 43.94  | -123.05 | Oregon                 | USA    | Crease et al. 2011    | ARE01_OR   |
| OR-28  |                    | JN117726           |          | <i>D. arenata</i>                            | ARE     | 43.83  | -124.12 | Oregon                 | USA    | Crease et al. 2011    | ARE02_OR   |
| OR-29  |                    | JN117727           |          | <i>D. arenata</i>                            | ARE     | 44.03  | -123.15 | Oregon                 | USA    | Crease et al. 2011    | ARE03_OR   |
| OR-30  |                    | JN117744           |          | <i>D. melanica</i>                           | MEL     | 43.97  | -124.11 | Oregon                 | USA    | Crease et al. 2011    | MEL_OR     |
| OR-31  |                    | JN117789           |          | <i>D. pulex</i>                              | NAPX    | 45.12  | -123.03 | Oregon                 | USA    | Crease et al. 2011    | X21_OR     |
| OR-32  | HQ434702, HQ434703 |                    | HQ434635 | <i>D. arenata</i>                            | ARE     | 43.92  | -123.02 | Creswell Court, Oregon | USA    | Vergilino et al. 2011 | CC3        |
| PA-01  | EU918537, EU918538 |                    |          | <i>D. pulicaria</i>                          | NAPC    | 41.13  | -75.58  | Pensylvania            | USA    | Omilian et al. 2008   | DUTCH_PA   |
| PA-02  |                    | JN117735           |          | <i>D. pulicaria</i>                          | NAPC    | 41.13  | -75.58  | Pensylvania            | USA    | Crease et al. 2011    | C04_PA     |
| PER-01 |                    | JN117749, JN117750 |          | South American <i>D. pulicaria</i>           | SAPC    | -15.70 | -69.50  | Titicaca Lake          | Peru   | Crease et al. 2011    | SAPC02     |
| POL-01 | KC536155, KC536156 |                    | KC536505 | <i>D. pulicaria</i>                          | EPC     | 49.19  | 20.08   | High Tatra Mts.        | Poland | this paper            | DP003_003  |
| POL-02 | KC536157, KC536158 |                    | KC536505 | <i>D. pulicaria</i>                          | EPC     | 49.19  | 20.08   | High Tatra Mts.        | Poland | this paper            | DP003_004  |
| POL-03 |                    |                    | KC536505 | <i>D. pulicaria</i>                          | EPC     | 49.19  | 20.08   | High Tatra Mts.        | Poland | this paper            | DP003_006  |
| POL-04 | KC536159, KC536160 |                    |          | <i>D. pulicaria</i>                          | missing | 49.19  | 20.08   | High Tatra Mts.        | Poland | this paper            | DP003_07M  |
| POL-05 |                    |                    | KC536506 | <i>D. pulicaria</i>                          | EPC     | 49.19  | 20.08   | High Tatra Mts.        | Poland | this paper            | DP003_009  |
| POL-06 |                    |                    | KC536504 | <i>D. pulicaria</i>                          | EPC     | 49.19  | 20.08   | High Tatra Mts.        | Poland | this paper            | DP004_02M  |
| POL-07 |                    |                    | KC536505 | <i>D. pulicaria</i>                          | EPC     | 49.19  | 20.08   | High Tatra Mts.        | Poland | this paper            | DP108_001  |
| POL-08 |                    |                    | KC536504 | <i>D. pulicaria</i>                          | EPC     | 49.19  | 20.08   | High Tatra Mts.        | Poland | this paper            | DP108_006  |
| POL-09 | KC536381, KC536382 | KC536015, KC536016 | KC536569 | <i>D. pulex</i>                              | EPX     | 53.80  | 21.98   | Masuria                | Poland | this paper            | DP096_001  |

|        |                              |                              |          |                                              |         |       |        |                         |        |                       |           |
|--------|------------------------------|------------------------------|----------|----------------------------------------------|---------|-------|--------|-------------------------|--------|-----------------------|-----------|
| POL-10 |                              |                              | KC536569 | <i>D. pulex</i>                              | EPX     | 53.80 | 21.98  | Masuria                 | Poland | this paper            | DP096_002 |
| POL-11 | KC536383, KC536384           |                              | KC536546 | <i>D. pulicaria</i>                          | EPC     | 53.75 | 21.78  | Masuria                 | Poland | this paper            | DP097_003 |
| POL-12 | KC536419, KC536420           | KC536048, KC536049           | KC536587 | <i>D. pulex</i>                              | EPX     | 50.76 | 15.70  | Giant Mts.              | Poland | this paper            | DP133_001 |
| POL-13 |                              |                              | KC536587 | <i>D. pulex</i>                              | EPX     | 50.76 | 15.70  | Giant Mts.              | Poland | this paper            | DP133_002 |
| POL-14 |                              |                              | KC536587 | <i>D. pulex</i>                              | EPX     | 50.76 | 15.70  | Giant Mts.              | Poland | this paper            | DP133_003 |
| QC-01  | KC536462, KC536463           | KC536091, KC536092           | KC536603 | <i>D. pulex</i>                              | NAPX    | 48.13 | -68.63 | Res. Duchesnier, Quebec | Canada | this paper            | DX015_001 |
| QC-02  | KC536466, KC536467           | KC536095                     | KC536604 | Hybrid <i>D. pulicaria</i> X <i>D. pulex</i> | NAPX    | 46.76 | -71.38 | Quebec city, Quebec     | Canada | this paper            | DX017_001 |
| QC-03  | KC536481, KC536482           | KC536105, KC536106           | KC536609 | <i>D. pulicaria</i>                          | NAPC    | 55.28 | -77.75 | Kuujuaarapik, Quebec    | Canada | this paper            | DX021_001 |
| QC-04  |                              |                              | KC536609 | <i>D. pulicaria</i>                          | NAPC    | 55.28 | -77.75 | Kuujuaarapik, Quebec    | Canada | this paper            | DX021_002 |
| QC-05  | KC536141, KC536142           | KC536124, KC536125           | KC536618 | <i>D. pulicaria</i>                          | NAPC    | 55.28 | -77.75 | Kuujuaarapik, Quebec    | Canada | this paper            | Clon2_001 |
| QC-06  |                              |                              | KC536618 | <i>D. pulicaria</i>                          | NAPC    | 55.28 | -77.75 | Kuujuaarapik, Quebec    | Canada | this paper            | Clon2_002 |
| QC-07  |                              |                              | KC536618 | <i>D. pulicaria</i>                          | NAPC    | 55.28 | -77.75 | Kuujuaarapik, Quebec    | Canada | this paper            | Clon2_003 |
| QC-08  |                              |                              | KC536615 | <i>D. pulicaria</i>                          | NAPC    | 55.28 | -77.75 | Kuujuaarapik, Quebec    | Canada | this paper            | n33       |
| QC-09  | KC536139, KC536140           | KC536119, KC536120           | KC536615 | <i>D. pulicaria</i>                          | NAPC    | 55.28 | -77.75 | Kuujuaarapik, Quebec    | Canada | this paper            | BGRJ_001  |
| QC-10  |                              |                              | KC536616 | <i>D. pulicaria</i>                          | NAPC    | 55.28 | -77.75 | Kuujuaarapik, Quebec    | Canada | this paper            | BGRJ_002  |
| QC-11  |                              |                              | KC536616 | <i>D. pulicaria</i>                          | NAPC    | 55.28 | -77.75 | Kuujuaarapik, Quebec    | Canada | this paper            | BGRJ_003  |
| QC-12  | KC536499, KC536500           | KC536130, KC536131           | KC536622 | Hybrid <i>D. pulicaria</i> X <i>D. pulex</i> | NAPX    | 55.28 | -77.75 | Kuujuaarapik, Quebec    | Canada | this paper            | n37_Dten2 |
| QC-13  |                              |                              | KC536617 | <i>D. pulicaria</i>                          | NAPC    | 55.28 | -77.75 | Kuujuaarapik, Quebec    | Canada | this paper            | n38_Dten4 |
| QC-14  | KC536501, KC536502           |                              | KC536623 | <i>D. pulicaria</i>                          | NAPC    | 55.28 | -77.75 | Kuujuaarapik, Quebec    | Canada | this paper            | n41_Dten6 |
| QC-15  | HQ434731                     |                              | HQ434651 | Hybrid <i>D. pulicaria</i> X <i>D. pulex</i> | NAPX    | 46.76 | -71.38 | Ste-Foy, Quebec         | Canada | Vergilino et al. 2011 | Gar3      |
| QC-16  | HQ434734                     |                              | FJ591109 | <i>D. pulex</i>                              | NAPX    | 55.28 | -77.75 | Kuujuaarapik, Quebec    | Canada | Vergilino et al. 2011 | K52       |
| QC-17  | HQ434736, HQ434737           |                              | FJ591096 | Hybrid <i>D. pulicaria</i> X <i>D. pulex</i> | NAPX    | 55.28 | -77.75 | Kuujuaarapik, Quebec    | Canada | Vergilino et al. 2011 | K92       |
| QC-18  | HQ434741, HQ434742, HQ434743 |                              | FJ591110 | Hybrid <i>D. pulicaria</i> X <i>D. pulex</i> | NAPC    | 55.28 | -77.75 | Kuujuaarapik, Quebec    | Canada | Vergilino et al. 2011 | K228      |
| QC-19  | HQ434744                     |                              | FJ591112 | <i>D. pulicaria</i>                          | NAPC    | 55.28 | -77.75 | Kuujuaarapik, Quebec    | Canada | Vergilino et al. 2011 | K230      |
| QC-20  | HQ434745, HQ434747           |                              | FJ591111 | Hybrid <i>D. pulicaria</i> X <i>D. pulex</i> | NAPC    | 55.28 | -77.75 | Kuujuaarapik, Quebec    | Canada | Vergilino et al. 2011 | K232      |
| QC-21  | HQ434749                     |                              | HQ434663 | Hybrid <i>D. pulicaria</i> X <i>D. pulex</i> | NAPX    | 48.37 | -67.23 | Metis, Quebec           | Canada | Vergilino et al. 2011 | Metis3    |
| QC-22  | EU918433, EU918434           |                              |          | <i>D. pulex</i>                              | NAPX    | 52.50 | -74.00 | Quebec                  | Canada | Omilian et al. 2008   | FAT1_QUE  |
| QC-23  | EU918435, EU918436           |                              |          | <i>D. pulex</i>                              | NAPX    | 52.50 | -74.00 | Quebec                  | Canada | Omilian et al. 2008   | GUY1_QUE  |
| QC-24  | EU918451, EU918452           |                              |          | <i>D. pulex</i>                              | NAPX    | 52.50 | -74.00 | Quebec                  | Canada | Omilian et al. 2008   | STX1_QUE  |
| QC-25  |                              | JN117741, JN117740           |          | <i>D. pulicaria</i>                          | missing | 55.28 | -77.75 | Kuujuaarapik, Quebec    | Canada | Crease et al. 2011    | C14_QC    |
| QC-26  |                              | JN117735, JN117752           |          | Hybrid <i>D. pulicaria</i> X <i>D. pulex</i> | NAPC    | 58.28 | -77.75 | Quebec                  | Canada | Crease et al. 2011    | CX02_QC   |
| QC-27  |                              | JN117784, JN117785           |          | <i>D. pulex</i>                              | NAPX    | 47.44 | -72.78 | Quebec                  | Canada | Crease et al. 2011    | X14_QC    |
| QC-28  |                              | JN117786, JN117761           |          | <i>D. pulex</i>                              | NAPX    | 46.37 | -71.19 | Quebec                  | Canada | Crease et al. 2011    | X15_QC    |
| QC-29  |                              | JN117761                     |          | <i>D. pulex</i>                              | NAPX    | 48.13 | -69.17 | Quebec                  | Canada | Crease et al. 2011    | X22_QC    |
| QC-30  |                              | JN117761, JN117790           |          | <i>D. pulex</i>                              | NAPX    | 46.03 | -73.45 | Quebec                  | Canada | Crease et al. 2011    | X23_QC    |
| RUS-01 | KC536343, KC536344           |                              | KC536563 | <i>D. pulicaria</i>                          | EPC     | 68.06 | 53.58  | Petchora Delta          | Russia | this paper            | DP083_004 |
| RUS-02 | KC536345, KC536346, KC536347 |                              | KC536564 | <i>D. tenebrosa</i>                          | TEN     | 68.06 | 53.58  | Petchora Delta          | Russia | this paper            | DP083_011 |
| RUS-03 |                              |                              | KC536564 | <i>D. tenebrosa</i>                          | TEN     | 68.06 | 53.58  | Petchora Delta          | Russia | this paper            | DP083_012 |
| RUS-04 |                              |                              | KC536564 | <i>D. tenebrosa</i>                          | TEN     | 68.06 | 53.58  | Petchora Delta          | Russia | this paper            | DP083_013 |
| RUS-05 |                              |                              | KC536571 | <i>D. tenebrosa</i>                          | TEN     | 68.77 | 53.15  | Petchora Delta          | Russia | this paper            | DP103_001 |
| RUS-06 |                              |                              | KC536572 | <i>D. tenebrosa</i>                          | TEN     | 68.77 | 53.15  | Petchora Delta          | Russia | this paper            | DP103_002 |
| RUS-07 |                              |                              | KC536572 | <i>D. tenebrosa</i>                          | TEN     | 68.77 | 53.15  | Petchora Delta          | Russia | this paper            | DP103_003 |
| RUS-08 | KC536348, KC536349, KC536350 |                              | KC536573 | <i>D. tenebrosa</i>                          | TEN     | 68.06 | 53.58  | Petchora Delta          | Russia | this paper            | DP104_001 |
| RUS-09 |                              |                              | KC536572 | <i>D. tenebrosa</i>                          | TEN     | 68.06 | 53.58  | Petchora Delta          | Russia | this paper            | DP104_002 |
| RUS-10 |                              |                              | KC536564 | <i>D. tenebrosa</i>                          | TEN     | 68.06 | 53.58  | Petchora Delta          | Russia | this paper            | DP104_003 |
| RUS-11 | KC536351, KC536352, KC536353 | KC536060, KC536061, KC536062 | KC536592 | <i>D. tenebrosa</i>                          | TEN     | 68.77 | 53.15  | Petchora Delta          | Russia | this paper            | DP160_002 |
| RUS-12 | KC536354, KC536355, KC536356 |                              | KC536592 | <i>D. tenebrosa</i>                          | TEN     | 68.77 | 53.15  | Petchora Delta          | Russia | this paper            | DP162_001 |
| RUS-13 | KC536357, KC536358, KC536359 | KC536063, KC536064           | KC536592 | <i>D. tenebrosa</i>                          | TEN     | 68.77 | 53.15  | Petchora Delta          | Russia | this paper            | DP162_003 |
| RUS-14 | KC536360, KC536361, KC536362 |                              | KC536592 | <i>D. tenebrosa</i>                          | TEN     | 68.77 | 53.15  | Petchora Delta          | Russia | this paper            | DP162_004 |
| RUS-15 | KC536471, KC536472           | KC536099, KC536100           | KC536606 | <i>D. tenebrosa</i>                          | TEN     | 71.98 | 102.55 | Khatanga                | Russia | this paper            | DX019_001 |
| RUS-16 |                              |                              | KC536606 | <i>D. tenebrosa</i>                          | TEN     | 71.98 | 102.55 | Khatanga                | Russia | this paper            | DX019_002 |
| RUS-17 | KC536473, KC536474           |                              | KC536606 | <i>D. tenebrosa</i>                          | TEN     | 71.98 | 102.55 | Khatanga                | Russia | this paper            | DX019_003 |
| RUS-18 |                              |                              | KC536606 | <i>D. tenebrosa</i>                          | TEN     | 71.98 | 102.55 | Khatanga                | Russia | this paper            | DX019_004 |
| RUS-19 | KC536475, KC536476, KC536477 | KC536101, KC536102           | KC536607 | <i>D. tenebrosa</i>                          | TEN     | 74.92 | 112.62 | Tsvetkov cape, Taimyr   | Russia | this paper            | DX020_001 |
| RUS-20 |                              |                              | KC536607 | <i>D. tenebrosa</i>                          | TEN     | 74.92 | 112.62 | Tsvetkov cape, Taimyr   | Russia | this paper            | DX020_002 |

|        |                                        |                              |          |                                              |         |       |         |                        |                 |                    |           |
|--------|----------------------------------------|------------------------------|----------|----------------------------------------------|---------|-------|---------|------------------------|-----------------|--------------------|-----------|
| RUS-21 |                                        |                              | KC536607 | <i>D. tenebrosa</i>                          | TEN     | 74.92 | 112.62  | Tsvetkov cape, Taimyr  | Russia          | this paper         | DX020_003 |
| RUS-22 | KC536478, KC536479, KC536480           | KC536103, KC536104           | KC536608 | <i>D. tenebrosa</i>                          | TEN     | 74.92 | 112.62  | Tsvetkov cape, Taimyr  | Russia          | this paper         | DX020_004 |
| SJM-01 | KC536389, KC536390, KC536391           | KC536021, KC536022, KC536023 | KC536579 | <i>D. pulicaria</i>                          | NAPC    | 78.92 | 11.88   | Storvatnet, Ny-Alesund | Svalbard        | this paper         | DP127_001 |
| SJM-02 | KC536392, KC536393, KC536394           | KC536024, KC536025, KC536026 | KC536580 | <i>D. tenebrosa</i>                          | TEN     | 78.92 | 11.88   | Storvatnet, Ny-Alesund | Svalbard        | this paper         | DP127_002 |
| SJM-03 | KC536395, KC536396, KC536397           | KC536027, KC536028, KC536029 | KC536581 | <i>D. pulicaria</i>                          | NAPC    | 78.93 | 11.88   | Solvatnet, Ny-Alesund  | Svalbard        | this paper         | DP128_001 |
| SJM-04 |                                        |                              | KC536581 | <i>D. pulicaria</i>                          | NAPC    | 78.93 | 11.88   | Solvatnet, Ny-Alesund  | Svalbard        | this paper         | DP128_002 |
| SJM-05 | KC536398, KC536399, KC536400, KC536401 | KC536030, KC536031           | KC536582 | <i>D. tenebrosa</i>                          | TEN     | 79.89 | 16.40   | Mosselbukta            | Svalbard        | this paper         | DP129_001 |
| SJM-06 |                                        |                              | KC536582 | <i>D. tenebrosa</i>                          | TEN     | 79.89 | 16.40   | Mosselbukta            | Svalbard        | this paper         | DP129_002 |
| SJM-07 | KC536402, KC536403, KC536404           | KC536032, KC536033, KC536034 | KC536583 | <i>D. pulicaria</i>                          | EPC     | 78.11 | 15.90   | Colesdalen             | Svalbard        | this paper         | DP130_001 |
| SJM-08 |                                        |                              | KC536583 | <i>D. pulicaria</i>                          | EPC     | 78.11 | 15.90   | Colesdalen             | Svalbard        | this paper         | DP130_002 |
| SJM-09 | KC536405, KC536406, KC536407           | KC536035, KC536036, KC536037 | KC536584 | <i>D. pulicaria</i>                          | NAPC    | 78.11 | 15.90   | Colesdalen             | Svalbard        | this paper         | DP130_003 |
| SJM-10 |                                        |                              | KC536584 | <i>D. pulicaria</i>                          | NAPC    | 78.11 | 15.90   | Colesdalen             | Svalbard        | this paper         | DP130_004 |
| SK-01  |                                        | JN117736, JN117737           |          | <i>D. pulicaria</i>                          | NAPC    | 52.13 | -105.13 | Saskatchewan           | Canada          | Crease et al. 2011 | C05_SK    |
| SK-02  |                                        | JN117740                     |          | <i>D. pulicaria</i>                          | NAPC    | 49.42 | -105.14 | Saskatchewan           | Canada          | Crease et al. 2011 | C13_SK    |
| SK-03  |                                        | JN117742, JN117740           |          | <i>D. pulicaria</i>                          | NAPC    | 49.42 | -105.14 | Saskatchewan           | Canada          | Crease et al. 2011 | C14_SK    |
| SK-04  |                                        | JN117740                     |          | <i>D. pulicaria</i>                          | NAPX    | 50.92 | -102.40 | Saskatchewan           | Canada          | Crease et al. 2011 | C17_SK    |
| SK-05  |                                        | JN117735, JN117767           |          | Hybrid <i>D. pulicaria</i> X <i>D. pulex</i> | NAPX    | 50.07 | -105.53 | Saskatchewan           | Canada          | Crease et al. 2011 | CX17_SK   |
| SK-06  |                                        | JN117735, JN117767           |          | Hybrid <i>D. pulicaria</i> X <i>D. pulex</i> | NAPX    | 51.27 | -103.72 | Saskatchewan           | Canada          | Crease et al. 2011 | CX18_SK   |
| SK-07  |                                        | JN117796, JN117797           |          | <i>D. pulex</i>                              | NAPX    | 50.07 | -105.53 | Saskatchewan           | Canada          | Crease et al. 2011 | X32_SK    |
| SK-08  |                                        | JN117767, JN117798           |          | <i>D. pulex</i>                              | NAPX    | 49.85 | -105.04 | Saskatchewan           | Canada          | Crease et al. 2011 | X33_SK    |
| SK-09  |                                        | JN117767, JN117799           |          | <i>D. pulex</i>                              | NAPX    | 49.85 | -105.04 | Saskatchewan           | Canada          | Crease et al. 2011 | X34_SK    |
| SVK-01 | KC536143, KC536144                     | KC535963, KC535964           | KC536503 | <i>D. pulicaria</i>                          | EPC     | 49.16 | 20.01   | High Tatra Mts.        | Slovak Republic | this paper         | DP001_001 |
| SVK-02 | KC536145, KC536146                     |                              |          | <i>D. pulicaria</i>                          | missing | 49.16 | 20.01   | High Tatra Mts.        | Slovak Republic | this paper         | DP001_003 |
| SVK-03 |                                        |                              | KC536503 | <i>D. pulicaria</i>                          | EPC     | 49.16 | 20.01   | High Tatra Mts.        | Slovak Republic | this paper         | DP001_004 |
| SVK-04 |                                        |                              | KC536503 | <i>D. pulicaria</i>                          | EPC     | 49.16 | 20.01   | High Tatra Mts.        | Slovak Republic | this paper         | DP001_006 |
| SVK-05 |                                        |                              | KC536503 | <i>D. pulicaria</i>                          | EPC     | 49.16 | 20.01   | High Tatra Mts.        | Slovak Republic | this paper         | DP001_007 |
| SVK-06 | KC536147, KC536148                     |                              | KC536503 | <i>D. pulicaria</i>                          | EPC     | 49.16 | 20.01   | High Tatra Mts.        | Slovak Republic | this paper         | DP001_008 |
| SVK-07 | KC536149, KC536150                     |                              | KC536503 | <i>D. pulicaria</i>                          | EPC     | 49.16 | 20.01   | High Tatra Mts.        | Slovak Republic | this paper         | DP001_009 |
| SVK-08 | KC536151, KC536152                     |                              | KC536504 | <i>D. pulicaria</i>                          | EPC     | 49.16 | 20.01   | High Tatra Mts.        | Slovak Republic | this paper         | DP001_010 |
| SVK-09 | KC536153, KC536154                     |                              | KC536503 | <i>D. pulicaria</i>                          | EPC     | 49.16 | 20.01   | High Tatra Mts.        | Slovak Republic | this paper         | DP001_011 |
| SVK-10 |                                        |                              | KC536503 | <i>D. pulicaria</i>                          | EPC     | 49.16 | 20.01   | High Tatra Mts.        | Slovak Republic | this paper         | DP001_012 |
| SVK-11 |                                        |                              | KC536503 | <i>D. pulicaria</i>                          | EPC     | 49.16 | 20.01   | High Tatra Mts.        | Slovak Republic | this paper         | DP107_001 |
| SVK-12 |                                        |                              | KC536503 | <i>D. pulicaria</i>                          | EPC     | 49.16 | 20.01   | High Tatra Mts.        | Slovak Republic | this paper         | DP107_006 |
| SVK-13 |                                        |                              | KC536507 | <i>D. pulicaria</i>                          | EPC     | 49.19 | 20.04   | High Tatra Mts.        | Slovak Republic | this paper         | DP005_02M |
| SVK-14 | KC536161, KC536162                     |                              | KC536508 | <i>D. pulicaria</i>                          | EPC     | 49.19 | 20.04   | High Tatra Mts.        | Slovak Republic | this paper         | DP005_003 |
| SVK-15 |                                        |                              | KC536508 | <i>D. pulicaria</i>                          | EPC     | 49.19 | 20.04   | High Tatra Mts.        | Slovak Republic | this paper         | DP005_004 |
| SVK-16 |                                        |                              | KC536508 | <i>D. pulicaria</i>                          | EPC     | 49.19 | 20.04   | High Tatra Mts.        | Slovak Republic | this paper         | DP005_005 |
| SVK-17 |                                        |                              | KC536507 | <i>D. pulicaria</i>                          | EPC     | 49.19 | 20.04   | High Tatra Mts.        | Slovak Republic | this paper         | DP005_006 |
| SVK-18 |                                        |                              | KC536507 | <i>D. pulicaria</i>                          | EPC     | 49.19 | 20.04   | High Tatra Mts.        | Slovak Republic | this paper         | DP005_007 |
| SVK-19 | KC536163, KC536164                     |                              | KC536508 | <i>D. pulicaria</i>                          | EPC     | 49.19 | 20.04   | High Tatra Mts.        | Slovak Republic | this paper         | DP006_09M |
| SVK-20 |                                        |                              | KC536508 | <i>D. pulicaria</i>                          | EPC     | 49.19 | 20.04   | High Tatra Mts.        | Slovak Republic | this paper         | DP109_001 |
| SVK-21 |                                        |                              | KC536508 | <i>D. pulicaria</i>                          | EPC     | 49.19 | 20.04   | High Tatra Mts.        | Slovak Republic | this paper         | DP109_006 |
| SVK-22 |                                        |                              | KC536508 | <i>D. pulicaria</i>                          | EPC     | 49.19 | 20.04   | High Tatra Mts.        | Slovak Republic | this paper         | DP110_001 |
| SVK-23 | KC536165, KC536166                     |                              | KC536509 | <i>D. pulicaria</i>                          | EPC     | 49.19 | 20.03   | High Tatra Mts.        | Slovak Republic | this paper         | DP007_002 |
| SVK-24 |                                        |                              | KC536506 | <i>D. pulicaria</i>                          | EPC     | 49.19 | 20.09   | High Tatra Mts.        | Slovak Republic | this paper         | DP009_003 |
| SVK-25 | KC536167, KC536168                     |                              | KC536510 | <i>D. pulicaria</i>                          | EPC     | 49.21 | 20.14   | High Tatra Mts.        | Slovak Republic | this paper         | DP014_03M |
| SVK-26 | KC536169, KC536170                     |                              | KC536511 | <i>D. pulicaria</i>                          | EPC     | 49.18 | 20.13   | High Tatra Mts.        | Slovak Republic | this paper         | DP015_001 |
| SVN-01 | KC536267, KC536268                     |                              | KC536535 | <i>D. pulicaria</i>                          | EPC     | 46.41 | 13.81   | Julian Alps            | Slovenia        | this paper         | DP039_001 |
| SVN-02 | KC536269, KC536270                     | KC535989, KC535990, KC535991 | KC536535 | <i>D. pulicaria</i>                          | EPC     | 46.41 | 13.81   | Julian Alps            | Slovenia        | this paper         | DP039_005 |
| SVN-03 | KC536271, KC536272                     |                              | KC536535 | <i>D. pulicaria</i>                          | EPC     | 46.41 | 13.81   | Julian Alps            | Slovenia        | this paper         | DP039_006 |
| SVN-04 | KC536273, KC536274                     |                              | KC536535 | <i>D. pulicaria</i>                          | EPC     | 46.41 | 13.81   | Julian Alps            | Slovenia        | this paper         | DP039_007 |
| SVN-05 | KC536275, KC536276                     |                              | KC536535 | <i>D. pulicaria</i>                          | EPC     | 46.41 | 13.81   | Julian Alps            | Slovenia        | this paper         | DP039_008 |
| SVN-06 |                                        |                              | KC536535 | <i>D. pulicaria</i>                          | EPC     | 46.41 | 13.81   | Julian Alps            | Slovenia        | this paper         | DP039_009 |
| SWE-01 | KC536329, KC536330                     |                              | KC536554 | <i>D. pulex</i>                              | EPX     | 58.48 | 11.66   | Munkedal               | Sweden          | this paper         | DP076_002 |
| SWE-02 |                                        |                              | KC536555 | <i>D. pulex</i>                              | EPX     | 58.48 | 11.66   | Munkedal               | Sweden          | this paper         | DP076_003 |



|        |                    |                    |          |                     |      |         |         |                           |         |                       |           |
|--------|--------------------|--------------------|----------|---------------------|------|---------|---------|---------------------------|---------|-----------------------|-----------|
| SWE-03 |                    |                    | KC536554 | <i>D. pulex</i>     | EPX  | 58.48   | 11.66   | Munkedal                  | Sweden  | this paper            | DP076_004 |
| SWE-04 | KC536331, KC536332 | KC536002, KC536003 | KC536556 | <i>D. pulex</i>     | EPX  | 58.77   | 11.87   | Furved                    | Sweden  | this paper            | DP077_003 |
| SWE-05 | KC536333, KC536334 | KC536004, KC536005 | KC536557 | <i>D. pulex</i>     | EPX  | 58.77   | 11.87   | Furved                    | Sweden  | this paper            | DP077_004 |
| SWE-06 |                    |                    | KC536557 | <i>D. pulex</i>     | EPX  | 58.77   | 11.87   | Furved                    | Sweden  | this paper            | DP077_005 |
| SWE-07 |                    |                    | KC536557 | <i>D. pulex</i>     | EPX  | 58.48   | 11.84   | Kvarnhultsbacken          | Sweden  | this paper            | DP078_002 |
| SWE-08 | KC536335, KC536336 | KC536006, KC536007 | KC536555 | <i>D. pulex</i>     | EPX  | 58.54   | 11.97   | Rubbestad                 | Sweden  | this paper            | DP079_001 |
| SWE-09 |                    |                    | KC536555 | <i>D. pulex</i>     | EPX  | 58.54   | 11.97   | Rubbestad                 | Sweden  | this paper            | DP079_002 |
| SWE-10 |                    |                    | KC536555 | <i>D. pulex</i>     | EPX  | 58.54   | 11.97   | Rubbestad                 | Sweden  | this paper            | DP079_003 |
| SWE-11 | KC536337, KC536338 |                    | KC536558 | <i>D. pulex</i>     | EPX  | 58.81   | 11.86   | Solberg                   | Sweden  | this paper            | DP080_001 |
| SWE-12 |                    |                    | KC536559 | <i>D. pulex</i>     | EPX  | 58.81   | 11.86   | Solberg                   | Sweden  | this paper            | DP080_002 |
| SWE-13 |                    |                    | KC536559 | <i>D. pulex</i>     | EPX  | 58.81   | 11.86   | Solberg                   | Sweden  | this paper            | DP080_003 |
| SWE-14 | KC536421, KC536422 | KC536050, KC536051 | KC536588 | <i>D. pulex</i>     | EPX  | 58.64   | 17.04   | Oxelosund                 | Sweden  | this paper            | DP136_001 |
| SWE-15 |                    |                    | KC536588 | <i>D. pulex</i>     | EPX  | 58.64   | 17.40   | Oxelosund                 | Sweden  | this paper            | DP136_002 |
| SWE-16 |                    |                    | KC536588 | <i>D. pulex</i>     | EPX  | 58.64   | 17.40   | Oxelosund                 | Sweden  | this paper            | DP136_003 |
| SWE-17 | KC536423, KC536424 | KC536052, KC536053 | KC536589 | <i>D. pulex</i>     | EPX  | 62.88   | 18.45   | Bonhamn                   | Sweden  | this paper            | DP151_001 |
| SWE-18 |                    |                    | KC536589 | <i>D. pulex</i>     | EPX  | 62.88   | 18.45   | Bonhamn                   | Sweden  | this paper            | DP151_002 |
| SWE-19 |                    |                    | KC536589 | <i>D. pulex</i>     | EPX  | 62.88   | 18.45   | Bonhamn                   | Sweden  | this paper            | DP151_003 |
| SWE-20 |                    |                    | KC536589 | <i>D. pulex</i>     | EPX  | 62.88   | 18.45   | Bonhamn                   | Sweden  | this paper            | DP151_004 |
| SWE-21 | KC536425, KC536426 | KC536054, KC536055 | KC536590 | <i>D. pulex</i>     | EPX  | 55.71   | 13.21   | Lund                      | Sweden  | this paper            | DP152_001 |
| SWE-22 |                    |                    | KC536590 | <i>D. pulex</i>     | EPX  | 55.71   | 13.21   | Lund                      | Sweden  | this paper            | DP152_002 |
| SWE-23 |                    |                    | KC536590 | <i>D. pulex</i>     | EPX  | 55.71   | 13.21   | Lund                      | Sweden  | this paper            | DP152_003 |
| SWE-24 | KC536427, KC536428 | KC536056, KC536057 | KC536590 | <i>D. pulex</i>     | EPX  | 55.72   | 13.44   | Svarta                    | Sweden  | this paper            | DP153_001 |
| SWE-25 |                    |                    | KC536590 | <i>D. pulex</i>     | EPX  | 55.72   | 13.44   | Svarta                    | Sweden  | this paper            | DP153_002 |
| SWE-26 |                    |                    | KC536590 | <i>D. pulex</i>     | EPX  | 55.72   | 13.44   | Svarta                    | Sweden  | this paper            | DP153_003 |
| WA-01  | EU918539, EU918540 |                    |          | <i>D.pulicaria</i>  | NAPC | 47.61   | -122.24 | Washington                | USA     | Omilian et al. 2008   | WASH_WA   |
| WA-02  |                    | JN117735           |          | <i>D.pulicaria</i>  | NAPC | 47.61   | -122.24 | Washington                | USA     | Crease et al. 2011    | C11_WA    |
| WI-01  | EU918449, EU918450 |                    |          | <i>D.pulex</i>      | NAPX | 44.50   | -89.50  | Wisconsin                 | USA     | Omilian et al. 2008   | SHK103_WI |
| WI-02  | EU918543, EU918544 |                    |          | <i>D.pulicaria</i>  | NAPC | 44.50   | -89.50  | Wisconsin                 | USA     | Omilian et al. 2008   | WIND2_WI  |
| WI-03  |                    | JN117771, JN117761 |          | <i>D.pulex</i>      | NAPX | 46.67   | -90.92  | Wisconsin                 | USA     | Crease et al. 2011    | X03_WI    |
| WI-04  |                    | JN117778, JN117788 |          | <i>D.pulex</i>      | NAPX | 45.66   | -88.10  | Wisconsin                 | USA     | Crease et al. 2011    | X20_WI    |
| WY-01  |                    | JN117738, JN117739 |          | <i>D. pulicaria</i> | NAPC | 44.55   | -110.38 | Yellowstone Lake, Wyoming | USA     | Crease et al. 2011    | C06_WY    |
| XX-01  | HQ434692, HQ434693 |                    |          | <i>D. pulicaria</i> | NAPC | missing | missing | missing                   | missing | Vergilino et al. 2011 | A24_204   |
